1 **Astrocyte glutamate transport is modulated by motor learning and regulates**  
2 **neuronal correlations and movement encoding by motor cortex neurons**

3

4 **Chloe Delepine<sup>1,2,4</sup>, Keji Li<sup>1,2,4</sup>, Jennifer Shih<sup>1</sup>, Pierre Gaudeaux<sup>1</sup>, Mriganka Sur<sup>1,2,3\*</sup>**

5

6 1. Picower Institute for Learning and Memory, Massachusetts Institute of Technology,  
7 Cambridge, MA, 02139, USA;

8 2. Department of Brain and Cognitive Sciences, Massachusetts Institute of Technology,  
9 Cambridge, MA, 02139, USA

10 3. Simons Center for the Social Brain, Massachusetts Institute of Technology, Cambridge, MA,  
11 02139, USA

12

13 4. These authors contributed equally

14

15 \*Lead contact: [msur@mit.edu](mailto:msur@mit.edu)

16

## 17 **ABSTRACT**

18 While motor cortex is crucial for learning precise and reliable movements, whether and how  
19 astrocytes contribute to its plasticity and function during motor learning is unknown. Here we  
20 report that primary motor cortex (M1) astrocytes in mice show *in vivo* plasticity during learning  
21 of a lever push task, as revealed by transcriptomic and functional modifications. In particular, we  
22 observe changes in expression of glutamate transporter genes and increased coincidence of  
23 intracellular calcium events. Astrocyte-specific manipulations of M1 are sufficient to alter motor  
24 learning and execution, and neuronal population coding, in the same task. Mice expressing  
25 decreased levels of the astrocyte glutamate transporter GLT1 show impaired and variable  
26 movement trajectories. Mice with increased astrocyte Gq signaling show decreased performance  
27 rates, delayed response times and impaired trajectories, along with abnormally high levels of  
28 GLT1. In both groups of mice, M1 neurons have altered inter-neuronal correlations and impaired  
29 population representations of task parameters, including response time and movement trajectories.  
30 Thus, astrocytes have a specific role in coordinating M1 neuronal activity during motor learning,  
31 and control learned movement execution and dexterity through mechanisms that importantly  
32 include fine regulation of glutamate transport.

33

## 34 **INTRODUCTION**

35 Astrocytes are now known to have diverse properties (Chai et al., 2017; Durkee and Araque,  
36 2019; Khakh and Deneen, 2019; Khakh and Sofroniew, 2015; Martín et al., 2015; Slezak et al.,  
37 2019), and contribute in multiple ways to the modulation of brain information processing  
38 (Adamsky et al., 2018; Araque et al., 1999; Corkrum et al., 2020; Haydon, 2001; Hennes et al.,  
39 2020; Kol et al., 2020; Lines et al., 2020; Mederos et al., 2019; Nagai et al., 2019; Oliveira et al.,  
40 2015; Padmashri et al., 2015; Paukert et al., 2014; Perea et al., 2014a; Poskanzer and Molofsky,  
41 2018; Poskanzer and Yuste, 2016; Santello et al., 2019; Sasaki et al., 2014; Yu et al., 2018).  
42 Previous studies have examined the role of astrocytes in learning and neuronal plasticity  
43 (Ackerman et al., 2021; Henneberger et al., 2010; Padmashri et al., 2015; Ribot et al., 2021; Suzuki  
44 et al., 2011). However, astrocyte contributions to neuronal population activity during behavioral  
45 tasks and learning remain largely unknown. While most studies of astrocyte-neuron interactions  
46 have been performed *in situ* in brain slices, a handful of *in vivo* studies have directly probed the  
47 effects of astrocytes on individual neurons (Perea et al., 2014b), or on neuronal populations (Lines

48 et al., 2020; Poskanzer and Yuste, 2016; Yu et al., 2018). Here we investigated *in vivo* the role of  
49 cortical astrocytes in a motor learning task that specifically involves the coordinated activity of  
50 neuronal populations, where mice were rewarded for pushing a lever following an auditory cue  
51 (Peters et al., 2014). Primary motor cortex M1 has been implicated in motor learning (Peters et al.,  
52 2017; Tennant et al., 2011), including task acquisition (Gloor et al., 2015; Kawai et al., 2015; Nudo  
53 et al., 1996), and performance (Dombeck et al., 2009; Harrison et al., 2012; Peters et al., 2014),  
54 and we hypothesized that M1 astrocytes would have a role in mediating population neuronal  
55 activity and the task components mediated by the activity.

56 We found changes in M1 astrocyte gene expression during and after learning of the lever push  
57 task, with significant enrichment in glutamate transporters, suggesting a key role for astrocyte  
58 glutamate transport in primary motor cortex function during motor learning. We also found  
59 changes in M1 astrocyte calcium activity, with an increased coincidence of calcium events during  
60 the lever push associated with learning. Astrocytes influence synaptic transmission via glutamate  
61 transporters, and respond to, as well as modulate, neuronal activity through Gq-GPCR signaling  
62 (Adamsky et al., 2018; Agulhon et al., 2013; Aida et al., 2015; Lines et al., 2020; Rothstein et al.,  
63 1996). We thus reasoned that altering astrocyte glutamate transporters and Gq signaling would  
64 reveal effects of astrocytes on neuronal encoding and learned motor behavior. Glutamate  
65 transporter type 1 (GLT1) is prominently expressed in the cortex and hippocampus (Danbolt, 2001;  
66 Rothstein et al., 1994; Tanaka et al., 1997) and is almost exclusively found on astrocyte  
67 membranes, at the vicinity of synapses. Astrocytes express an extensive variety of G-protein  
68 coupled receptors (GPCRs) and second messenger systems to interact with and respond to the  
69 signals present in the extracellular environment (Kofuji and Araque, 2020; Porter and McCarthy,  
70 1997). In particular, Gq-GPCR pathway activation in astrocytes of selected brain regions has been  
71 shown to influence specific behaviors and may be associated with modulation of glutamate  
72 transport (Adamsky et al., 2018; Agulhon et al., 2013; Cao et al., 2013; Chen et al., 2016; Lines et  
73 al., 2020; Martin-Fernandez et al., 2017; Scofield et al., 2015).

74 Using a transgenic mouse line in which we inhibited the expression of the glutamate  
75 transporter GLT1 locally in M1, we found that decreasing astrocyte glutamate clearance prevented  
76 learning of a stereotypical motor trajectory while preserving response time and task success rate.  
77 Expression of the engineered human muscarinic G protein-coupled receptor hM3Dq (Gq  
78 DREADD) in M1, activated by low doses of clozapine-N-oxide (CNO) (Agulhon et al., 2013;

79 Armbruster et al., 2007; Roth, 2016), revealed that modulation of astrocyte Gq signaling impaired  
80 multiple parameters of task performance, leading to decreased performance rate, delayed response  
81 time and impaired learning of the trajectory. Using genetically encoded calcium indicators and  
82 high-resolution two-photon imaging, we imaged M1 layer 2/3 neuronal activity during execution  
83 of the motor task. Knockdown of astrocyte GLT1 increased the pool of active neurons and  
84 decreased neuronal correlations during movement. In contrast, activation of astrocyte Gq signaling  
85 abnormally increased neuronal correlations. Decoding and encoding models revealed changes in  
86 neuronal coding of task parameters following GLT1 reduction or Gq signaling increase, most  
87 critically in the representation of movement trajectories consistent with behavioral changes. These  
88 findings demonstrate specific *in vivo* contributions by astrocytes to the function of M1 layer 2/3  
89 neuronal ensembles during motor learning, and their encoding of learned trajectories and task  
90 parameters.

91

## 92 **RESULTS**

### 93 **Motor Learning Leads to Modification of Gene Expression Profiles in M1 Astrocytes**

94 We trained mice to perform a cued lever push task (Peters et al., 2014) in which a lever press  
95 beyond a set threshold following trial start was rewarded with a water drop (**Figure 1A**). As  
96 expected, mice improved their success rate with training time, starting with a phase of rapid  
97 learning by day 3 (“novice” mice) and reaching a performance plateau after two weeks of training  
98 (“expert” mice) (**Figure 1B**).

99 We first used RNA sequencing (RNAseq) to identify gene expression changes in M1  
100 astrocytes associated with learning. M1 cortices of mice were extracted after no training (untrained  
101 “naïve” mice), training in the lever push task for three days (partially trained novice mice), or  
102 training in the lever push task for nineteen days (fully trained expert mice) (**Figure 1A**). To match  
103 stress levels, all three groups were water-restricted and head-fixed for the same duration as the  
104 expert mice. Astrocytes were isolated using ACSA-2 immuno-magnetic sorting (Holt and Olsen,  
105 2016) (**Figure 1A**). We validated the isolation protocol by comparing the normalized gene counts  
106 of cell-type specific markers for the three groups. Samples of all the groups were similarly enriched  
107 in astrocyte-specific genes and depleted of other brain cell markers (**Figure 1B**). RNAseq was  
108 performed and results analyzed using the EdgeR package (Bioconductor) to identify (1)  
109 differentially expressed genes (DEGs) and (2) significantly enriched gene sets in astrocytes from

110 novice and expert mice compared to naive mice (**Figure 1D**). We found 27 DEGs in novice mice  
111 and 36 DEGs in expert mice (p-value < 0.05) with an overlap of 11 DEGs (**Figure 1E**,  
112 **Supplemental Table 1**). The numbers of DEGs which were up or down-regulated were similar  
113 (**Figure 1E**). We used the PANTHER classification system to analyze the DEG list (Mi et al.,  
114 2019). Several Gene Ontology (GO) biological processes and molecular functions were enriched  
115 in the DEG list of known protein coding genes (**Supplemental Table 2**). The differentially  
116 regulated GO categories were mostly related to metabolism, transcription and signaling. Moreover,  
117 DEGs were significantly enriched in membrane or extracellular protein coding genes, suggesting  
118 the importance of transporters, receptors and cell-cell communication (**Supplemental Table 2**).

119 We performed a Gene Set Enrichment Analysis (GSEA) of the RNAseq data, which identifies  
120 sets of genes with expression changes that may be small, and therefore not identified individually  
121 by DEG analysis, but that collectively contribute to the dysregulation of a shared biological  
122 function (GO category). We identified 99 and 100 gene sets in novice and expert mice respectively,  
123 that were significantly enriched relative to other genes in terms of differential expression (**Figure**  
124 **1D**). Most of the enriched gene sets were overlapping GO categories of transmembrane  
125 transporters such as Symporter Activity, Secondary Active Transmembrane Transporter Activity,  
126 Amino Acid Transporter Activity, L-Glutamate Transmembrane Transport, Organic Acid  
127 Transmembrane Transport, and Sodium Ion Transmembrane Transporter (**Figure 1F**,  
128 **Supplemental Table 3**). The GO: L-Glutamate Transport gene set contained only two genes,  
129 coding for the two astrocyte-specific glutamate transporters GLUT1 (*Slc1a2*) and GLAST (*Slc1a3*),  
130 with high and low cortical expression levels respectively. Not only was this gene set significantly  
131 enriched, it was also included in most of the other enriched GO category sets (**Figure 1F**,  
132 **Supplemental Table 3**). The GO: Solute Sodium Symporter Activity gene set was also contained  
133 in most of the enriched gene sets, with 6 genes expressed in M1 cortex samples including astrocyte-  
134 specific glutamate transporters (*Slc1a2*/GLT1 and *Slc1a3*/GLAST) and GABA transporters  
135 (*Slc6a1*/GAT1 and *Slc6a11*/GAT3) (**Supplemental Table 3**). We validated with RTqPCR the  
136 expression changes of genes in these gene sets in expert WT mice compared to naive WT mice  
137 (**Supplemental Figure 1A**). To control for the specificity of the observed changes to the forelimb  
138 M1 cortex, we performed the same experiment with left hindlimb M1 (hM1) cortex samples  
139 (**Supplemental Figure 1B**). We observed no significant differences in hM1 expression levels for  
140 most genes, but we noted a trend for a few genes, and a significant change for one gene, *Slc6a1*,

141 to be upregulated in expert mice in both the forelimb and hindlimb motor cortex, supporting the  
142 idea that large regions of mouse M1 and even wider swaths of cortex are partially activated during  
143 reward-related movement (Musall et al., 2019).

144 These results indicate that M1 cortical astrocytes undergo changes in gene expression  
145 associated with motor learning that may underlie mechanisms of astrocyte contributions to M1  
146 function. Furthermore, they highlight the importance of glutamate transporter modulation for our  
147 motor learning task.

148

### 149 **Motor Learning Leads to Increased Coactivation of Calcium Events in M1 Astrocyte**

150 In addition to changes in gene expression, we assessed functional changes in astrocytes as  
151 a result of learning the lever push task. Astrocytes respond to neuronal and synaptic activity with  
152 complex spatiotemporal fluctuations in intracellular calcium, localized in their soma, branches and  
153 in “microdomains” within their fine processes (Agarwal et al., 2017; Arizono et al., 2020; Bindocci  
154 et al., 2017; Di Castro et al., 2011; Shigetomi et al., 2013; Srinivasan et al., 2015; Stobart et al.,  
155 2018). To determine if astrocyte calcium signals reflect motor learning, we performed chronic  
156 imaging of calcium activity using the membrane-bound calcium indicator GCaMP6f-Lck driven  
157 by the Aldh1l1 promoter, and detected and analyzed calcium events using the AQuA algorithm  
158 (Wang et al., 2019) (**Figure 2A, Supplemental Video 1**). After two weeks of training, mice  
159 showed increased coincidence of calcium activity during the lever push (**Figure 2**). In novice  
160 animals, the calcium events detected during the lever push were rarely coincident, moreover their  
161 DF/F0 had low cross-correlations, indicating that the fluorescence changes detected as movement-  
162 related events were not z-movement artifacts (**Supplemental Figure 2**). While the number, area  
163 and amplitude of individual events did not change in expert vs. novice mice (novice= $0.9741 \pm 0.074$   
164 DF/F0, expert= $0.9559 \pm 0.053$  DF/F0, n=7) (**Figure 2B**), the percentage of trials in which two or  
165 more events occurred concurrently during the movement was increased (novice= $0.15 \pm 0.052$ ,  
166 expert= $0.2146 \pm 0.043$ , n=7) (**Figure 2C-D**). As a consequence, the average trial activity was  
167 increased (novice= $0.1375 \pm 0.01$ , expert= $0.1837 \pm 0.02$ , n=7) (**Figure 2E-F**). These results indicate  
168 that the pattern of calcium signaling in M1 astrocytes changes during the course of motor learning,  
169 potentially via the regulation of localized calcium events by GLT1 (see Discussion). This enhanced  
170 coincidence of astrocyte calcium events could reflect, as well as contribute to, the coordinated  
171 activation of M1 synapses and neurons.

172

173 **Decreased GLT1 Levels and Astrocyte Gq Pathway Activation in M1 Impair Motor**  
174 **Learning-Associated Changes in Gene Expression**

175 Our gene expression analyses strongly implicated the astrocyte glutamate transporter GLT1  
176 in learning-related changes. GLT1 critically influences synaptic transmission, as shown *in vitro*  
177 and in slices *in situ* (Aida et al., 2015; Arnth-Jensen et al., 2002; Cui et al., 2014; Huang et al.,  
178 2004; Oliet et al., 2001; Omrani et al., 2009; Rothstein et al., 1996; Takayasu et al., 2006; Tanaka  
179 et al., 1997; Tsukada et al., 2005; Tzingounis and Wadiche, 2007). Moreover, astrocyte GLT1 has  
180 an important role in neuronal plasticity, as demonstrated *in situ* (Filosa et al., 2009; Oliet et al.,  
181 2001; Omrani et al., 2009). While mouse models of GLT1 knockdown have shown major  
182 behavioral deficits, previous studies largely involved brain-wide and complete knockdown (Aida  
183 et al., 2015; Cui et al., 2014; Gomez et al., 2019; Niederberger et al., 2003; Pardo et al., 2006). To  
184 specifically explore the role of GLT1 expression in M1 astrocytes *in vivo* during motor learning,  
185 we delivered a viral vector encoding the CRE-recombinase under the astrocyte-specific GFAP  
186 promoter unilaterally in M1 cortex of GLT1-flox heterozygous mice (“GLT1”) and their wild-type  
187 littermates (“WT”) (**Figure 3A**). Two weeks after injection, the expression level of GLT1 was  
188 decreased to around 50% at both mRNA and protein levels (mRNA ratio=0.54 ± 0.088, WT  
189 n=10, GLT1 n=6; protein ratio=0.55 ± 0.049, WT n=6, GLT1 n=8) (**Figure 3B, C; Supplemental**  
190 **Figure 3**).

191 Gq pathway activation in astrocytes has diverse effects on astrocytes, affecting calcium  
192 release from intracellular stores, astrocyte-neuron functions and specific behaviors (Adamsky et  
193 al., 2018; Agulhon et al., 2013; Cao et al., 2013; Chen et al., 2016; Martin-Fernandez et al., 2017;  
194 Scofield et al., 2015). To explore the effect of the Gq pathway in M1 astrocytes, we used an  
195 engineered Gq-coupled designer receptor (DREADD) hM3Dq that can be activated by exogenous  
196 clozapine-N-oxide (CNO) in a time-restricted manner (Armbruster et al., 2007; Roth, 2016). We  
197 injected a viral hM3Dq-mCherry construct unilaterally in M1 under the astrocyte specific GFAP  
198 promoter (**Figure 3D**) (Armbruster et al., 2007; Roth, 2016). Co-staining with astrocyte marker  
199 S100beta showed high specificity and high density of expressing cells (>98%) (**Supplemental**  
200 **Figure 4A**).

201 Based on the motor learning-associated changes in transcriptomic expression of genes and  
202 gene sets in M1 astrocytes of wildtype mice (**Figure 1**), we explored the expression of a selection

203 of these genes using RTqPCR in Gq and GLT1 naïve and expert mice (**Figure 3E-G**). Genes were  
204 selected within the previously identified DEGs (*Bsg*, *Spock2* and *Slc6a6*) and GSEA gene sets  
205 (*Slc1a2*, *Slc1a3* from GO: L-glutamate transmembrane transport, and *Slc1a2*, *Slc1a3*, *Slc6a6*,  
206 *Slc6a1*, *Slc6a11* from GO: solute sodium symporter activity) (**Figure 3E**). First, all of the genes  
207 showed significant upregulation in expert WT mice compared to untrained (naïve) WT mice,  
208 confirming the RNAseq results in independent samples and experiments (**Figure 3E**). In contrast,  
209 both GLT1 and Gq mice showed no learning-associated difference for the selected genes, with the  
210 exception of *Bsg* which was significantly downregulated in GLT1 expert mice compared to GLT1  
211 naïve mice and significantly upregulated in Gq expert mice compared to Gq naïve mice (**Figure**  
212 **3E, G**). *Slc1a2* (GLT1) was significantly downregulated in GLT1 mice as expected (**Figure 3B,**  
213 **C; F, G**), but significantly upregulated in Gq mice (**Figure 3F, G**).

214 Thus, Gq activation and GLT1 reduction both impair motor learning-associated gene  
215 expression changes, and have opposite effects on GLT1 expression. These analyses led us to  
216 examine behavioral and neuronal consequences of GLT1 reduction and Gq activation during motor  
217 learning.

218

### 219 **Decreased GLT1 Levels in M1 Astrocytes Alter Movement Trajectories**

220 In mice trained daily in the lever push task (**Figure 1A**), WT mice improved their success rate  
221 and decreased their response time with training (**Figure 4A, B**), as previously shown (Peters et al.,  
222 2014). Additionally, their lever push movements became more stereotyped (more similar across  
223 trials) and more precise (smoother) (**Figure 4C-E**). GLT1 mice had similar success rates and  
224 response times as WT controls (**Figure 2A, B**). However, GLT1 mice showed deficits in learning-  
225 associated stereotyped movements, as indicated at training days 12-14 by the reduced average  
226 pairwise trial-to-trial similarity of the movement trajectory (average pairwise correlation WT  
227  $0.82 \pm 0.011$   $n=15$ , GLT1  $0.71 \pm 0.014$   $n=12$ ) and low dexterity (smoothness coefficient WT  
228  $0.73 \pm 0.031$   $n=15$ , GLT1  $0.46 \pm 0.032$   $n=12$ ) (**Figure 2F-H**). Thus, a reduction of astrocyte GLT1  
229 expression in M1 is sufficient to perturb the stereotypy and smoothness of movement trajectories  
230 that accompany motor learning.

231

### 232 **Astrocyte Gq Pathway Activation in M1 Impairs Task Performance**



233        Activation of Gq-DREADD expressing astrocytes upon CNO application has been shown in  
234 brain slices to induce a release of calcium from the intracellular stores and an increase of  
235 intracellular calcium signaling (Aguilhon et al., 2013). However, to our knowledge, this effect has  
236 rarely been examined *in vivo*. We injected unilaterally in M1 a viral GFAP-hM3Dq-mCherry  
237 construct in astrocyte-specific cytoplasmic GCaMP expressing mice (GFAP-GCaMP5G mouse  
238 line) to image *in vivo* calcium activity in astrocytes, 30 min after intraperitoneal injection of CNO.  
239 We observed that a low dose of CNO triggered an increase in intracellular calcium as measured by  
240 the baseline GCaMP fluorescence (**Supplemental Figure 4B**), along with a decrease in frequency  
241 and amplitude of calcium events (**Supplemental Figure 4C-E**), consistent with near saturation of  
242 signaling due to the depletion of internal calcium stores. Similarly, a recent study found that Gq-  
243 DREADD activation in cortical astrocytes almost completely abolished calcium dynamics  
244 (Vaidyanathan et al., 2021).

245        We trained Gq-DREADD expressing mice (“Gq”) and controls (“CTRL”) in the lever push  
246 task. Two weeks after virus injection, mice were trained daily for 14 days of training sessions, with  
247 an IP injection of a low dose of CNO 30 min before training started (**Figure 5**). Training was  
248 continued for six additional days with an injection of vehicle (saline) solution instead of CNO  
249 (**Figure 5**). Gq mice injected with CNO showed a decreased performance rate (average hit rate  
250 Gq+CNO  $0.64 \pm 0.038$  n=7, CTRL+CNO  $0.81 \pm 0.029$  n=13), as measured by the fraction of  
251 successful trials, that improved rapidly after withdrawal of CNO (saline injection) (average hit rate  
252 Gq+saline  $0.82 \pm 0.032$  n=7) (**Figure 5A**). Gq mice injected with CNO also had increased response  
253 times (average response time, Gq+CNO  $1.46 \pm 0.10$  n=7, CTRL+CNO  $0.71 \pm 0.077$  n=13) that  
254 improved upon CNO withdrawal (average response time, Gq+saline  $1.02 \pm 0.13$  n=7) (**Figure 5B**).  
255 Finally, Gq mice showed a decreased stereotypy of movement, as indicated by the lower average  
256 pairwise trial-to-trial similarity of the movement trajectories (average pairwise correlation  
257 CTRL+CNO  $0.73 \pm 0.013$  n=13, Gq+CNO  $0.68 \pm 0.016$  n=7). This was rescued by withdrawal of  
258 CNO (average pairwise correlation, Gq+saline  $0.75 \pm 0.016$  n=7) (**Figure 5D**). However, we did  
259 not observe any significant difference in movement smoothness (**Figure 5E**). Thus, Gq signaling  
260 activation in M1 astrocytes during motor learning is sufficient to temporarily perturb task  
261 performance by decreasing performance rate, slowing responses and reducing the stereotypy of  
262 movement trajectories.

263 As hit rate and response time were not fully rescued by CNO withdrawal, we examined a  
264 CNO-independent effect of Gq-DREADD by injecting Gq mice with saline solution, 30 min before  
265 training, throughout the training. We did not observe any significant difference between the control  
266 groups (**Supplemental Figure 5A, B**). Thus, the residual effects on behavioral performance in Gq-  
267 DREADD mice treated with CNO are likely the result of disrupted Gq signaling in astrocytes.

268

### 269 **Decreased GLT1 Levels in M1 Astrocytes Reduce Neuronal Signal Correlations**

270 GLT1 knockdown has been shown to drive neuronal hyperexcitability (Aida et al., 2015;  
271 Arnth-Jensen et al., 2002; Filosa et al., 2009; Huang et al., 2004; Olier et al., 2001; Omrani et al.,  
272 2009; Rothstein et al., 1996; Takayasu et al., 2006; Tanaka et al., 1997; Tsukada et al., 2005;  
273 Tzingounis and Wadiche, 2007). Given our finding that decreased GLT1 expression levels in M1  
274 astrocytes affected the learning and execution of movement trajectories, we examined the effects  
275 of GLT1 astrocyte deficiency on M1 layer 2/3 neuron activity *in vivo*. Previous studies have shown  
276 that in WT mice, layer 2/3 neurons show plasticity associated with learning the lever push task,  
277 with the emergence of an ensemble of correlated neurons associated with the learned movement  
278 (Peters et al., 2014). We used two-photon imaging and the calcium indicator GCaMP6s to record  
279 the calcium activity of M1 layer 2/3 neurons during the lever push task in expert animals (**Figure**  
280 **6A,B, Supplemental Video 2**). We found that the average neuronal activity pattern during  
281 successful trials was similar in WT and GLT1 mice, with very low activity at baseline (no  
282 movement) and an elevation of the calcium signal during the lever push movement period (**Figure**  
283 **6B,C**). In WT mice, around 20% of neurons were active on average during the movement period  
284 of each trial (**Figure 6D**). GLT1 mice showed an increased percentage of neurons that were active  
285 during the movement period (WT:  $19.89\% \pm 1.89$ , n= 6 mice; GLT1:  $29.62\% \pm 3.01$ , n= 5 mice)  
286 (**Figure 6D, Supplemental Figure 6A**). Neuron-to-neuron signal correlation, measured by  
287 averaging the distance correlation coefficient between the concatenated trial activity vectors of  
288 pairs of single neurons, was high for a subset of WT neurons (**Figure 6E-F, Supplemental Figure**  
289 **6B**). This group of highly correlated neurons was not found in the GLT1 trained mice (**Figure 6E-**  
290 **F, Supplemental Figure 6B**). Thus, M1 neurons in trained GLT1 mice showed significantly  
291 reduced neuronal signal correlations compared to WT mice (WT:  $0.4091 \pm 0.01415$ , n=6 mice;  
292 GLT1:  $0.3516 \pm 0.01835$ , n= 5 mice) (**Figure 6E-F**).

293

## 294 **Gq Pathway Activation in M1 Astrocytes Increases Neuronal Signal Correlations**

295 We also studied the calcium activity of M1 layer 2/3 neurons during movement execution in  
296 control and Gq mice at expert time points, with CNO intraperitoneal injections (**Figure 7A, B**).  
297 The activity patterns of the neuronal populations were similar in the two groups (**Figure 7B, C**).  
298 The fraction of active neurons in Gq mice injected with CNO was not significantly different from  
299 control mice injected with CNO (**Figure 7D, Supplemental Figure 6C**). Contrary to what we  
300 observed in the GLT1 mice, Gq mice showed increased neuron-to-neuron signal correlations, with  
301 a larger fraction of the neurons being highly correlated (CTRL+CNO:  $0.323 \pm 0.02267$  n=9,  
302 Gq+CNO: mean= $0.4074 \pm 0.02154$ , n=6) (**Figure 7E-F, Supplemental Figure 6D**). Thus, Gq  
303 pathway activation in M1 astrocytes is sufficient to trigger increased correlated activity of M1  
304 neurons.

305

## 306 **Astrocyte Manipulations Modulate M1 Neuronal Encoding of Task Parameters**

307 Our behavioral findings showed that both astrocyte manipulations led to deficits in movement  
308 trajectory and, in the case of Gq mice but not GLT1 mice, affected hit rate and response time  
309 (**Figures 4 and 5**). To determine the deficit associated with these astrocyte manipulations at the  
310 neuronal coding level, we fitted decoding models of M1 neuron population activity to the push  
311 trajectory (**Supplemental Figure 5**; see Methods). The control groups of the GLT1 inhibition and  
312 Gq activation cohorts had similar task performances, and therefore were pooled together as the  
313 “WT” group for the decoding and encoding analyses. A support vector regression (SVR) model  
314 was used to predict the push trajectory during each training session from neuronal population  
315 spiking rate (**Supplemental Figure 6A, B**). For each neuronal population sample, the predictive  
316 power of the decoding model was evaluated by calculating the mutual information (M.I.) between  
317 predicted trajectory and the actual push trajectory (**Supplemental Figure 6C**). In WT mice, the  
318 models produced more accurate predictions of lever movement trajectories (**Supplemental Figure**  
319 **6C**). In both Gq and GLT1 neuronal populations, the M.I. values between predicted and actual  
320 trajectories were significantly lower than that of WT neuron populations (**Supplemental Figure**  
321 **6C**; median values: WT: 0.104, GLT1: 0.066, Gq: 0.072). These results thus indicate that in M1,  
322 astrocyte specific manipulations of glutamate transport and Gq signaling reduce neuronal  
323 population encoding of movement trajectory.

324 Because M1 neurons have been suggested to encode more than just directed movement signals  
325 (Doron and Brecht, 2015), we evaluated the encoding of specific behavioral features by single M1  
326 neurons in WT, GLT1 and Gq mice. We created GLM models to predict individual neuronal  
327 activity during each trial from these specific behavioral features (Engelhard et al., 2019), and  
328 compared the prediction performance of the models between the three groups (**Figure 8**,  
329 **Supplemental Figure 7**; see Methods). The models used seven behavioral features as predictors,  
330 including two event variables - start and reward (or movement threshold); two whole trial variables  
331 - hit/miss and response time; and three continuous variables - movement trajectory, movement  
332 speed, and a step function (“moving”) indicating whether the animal started moving in a trial  
333 (**Figure 8A**). In WT mice, push speed, trial success (hit/miss), and response time were all  
334 predictive of the neuronal activity (median  $R^2 > 1\%$ ), while the two event variables, the motion  
335 indicator and the raw movement trajectory were not very predictive (median  $R^2 < 1\%$ ) (**Figure**  
336 **8B, Supplemental Figure 8**). The full model with all 7 behavioral features predicted less single  
337 neuron activity variation and less encoding power for both GLT1 and Gq mice compare to WT  
338 (**Figure 8C**; medians: WT: 0.104, GLT1: 0.066, Gq: 0.072). Moreover, the relative contribution  
339 of different behavioral features was altered in neurons from GLT1 mice compared to WT, in favor  
340 of a proportionately increased encoding of the response time (**Figure 8D**). This is consistent with  
341 the impaired movement trajectory but preserved response time and success rate observed for GLT1  
342 mice (**Figure 4**). In contrast, neurons from Gq mice showed an overall reduced but largely  
343 conserved relative contribution of different behavioral features (**Figure 8D**), suggesting a  
344 generalized reduction of the encoding of task parameters. This is consistent with Gq mice showing  
345 behavioral impairments in both task performance and movement trajectory (**Figure 5**).

346

## 347 **DISCUSSION**

348 Motor cortex is crucial for motor learning, accurate motor control and motor dexterity  
349 (Dombeck et al., 2009; Gloor et al., 2015; Harrison et al., 2012; Kawai et al., 2015; Nudo et al.,  
350 1996; Peters et al., 2017, 2014; Tennant et al., 2011). In recent years, astrocytes have emerged as  
351 key contributors to neuronal activity and plasticity (Ackerman et al., 2021; Adamsky et al., 2018;  
352 Araque et al., 1999; Corkrum et al., 2020; Haydon, 2001; Hennes et al., 2020; Kol et al., 2020;  
353 Lines et al., 2020; Mederos et al., 2019; Nagai et al., 2019; Oliveira et al., 2015; Paukert et al.,  
354 2014; Perea et al., 2014a; Poskanzer and Molofsky, 2018; Poskanzer and Yuste, 2016; Ribot et al.,

2021; Santello et al., 2019; Sasaki et al., 2014; Yu et al., 2018); however, the role of astrocytes in motor cortex microcircuits *in vivo* has not been investigated so far. We show that astrocyte-specific manipulations of M1 *in vivo*, targeting glutamate clearance and Gq signaling, impacts learning and performance in a lever push task by modulation of population neuronal activity, in particular their inter-neuronal correlations and trajectory encoding, and the encoding of task parameters by single neurons. Mice expressing decreased levels of astrocyte glutamate transporter GLT1 in M1 showed normal success rate and response timing but impaired learning and execution of a stereotyped (reliable) and precise (smooth) movement trajectory. M1 neuronal population activity was strongly decorrelated and their encoding of movement trajectory was impaired. Encoding of task parameters by M1 neurons revealed a proportionately greater representation of response time, consistent with behavioral preservation of response time and success rates. Mice with astrocyte Gq signaling activation in M1 that were trained in the same task showed decreased success rate, delayed response time and impaired learning and execution of the stereotyped movement. Their altered task performance was accompanied by high levels of non-encoding M1 neuronal signal correlation, reduced population encoding of movement trajectory, and non-specific reduction of encoding of task parameters by single neurons. Using M1 as a test bed, these findings thus provide quantitative evidence for the role of astrocytes in influencing the coding of information by single neurons and neuronal populations during learning.

Our manipulations were motivated by changes in gene expression and calcium activity of M1 astrocytes during the lever push task. We observed changes in expression for a small number of individual genes and for a larger number of gene sets. Combined with the finding that calcium events in astrocytes become more coincident with the lever push movement, our results suggested that astrocytes display plasticity at the gene expression and functional levels that are associated with motor learning. Therefore, astrocyte-specific manipulations would be expected to alter behavioral and neuronal function during learning. In particular, glutamate transport stood out from the identified enriched gene sets, supporting the hypothesis that astrocyte glutamate transport has a major role in M1 during motor learning.

The astrocytic glutamate transporter GLT1 is the major glutamate transporter in the cerebral cortex. Its role in regulating glutamate availability and accumulation of extracellular glutamate has been well documented, along with its role in limiting glutamate spillover to neighboring synapses and extrasynaptic receptors (Arnth-Jensen et al., 2002; Asztely et al., 1997; Bergles et al., 1999;

386 Diamond and Jahr, 1997; Rothstein et al., 1996; Tanaka et al., 1997). Increasing evidence also  
387 links GLT1 to localized calcium events. While several pathways potentially contribute to such  
388 events, including membrane channels (Rungta et al., 2016; Shigetomi et al., 2013), metabotropic  
389 and ionotropic receptor activation (Agulhon et al., 2012), and membrane transporters  
390 (Bernardinelli et al., 2006), recent evidence has demonstrated that mitochondrial calcium efflux  
391 accounts for many of the observed calcium events *in vivo* (Jackson et al., 2014; Robinson and  
392 Jackson, 2016). A working hypothesis is that synaptically released glutamate is removed via GLT1  
393 (with a net influx of sodium ions) and converted to glutamine, metabolized to generate ATP by  
394 local mitochondria, which generates focal mitochondrial calcium signals (Griffiths and Rutter,  
395 2009; Jackson and Robinson, 2015; Stephen et al., 2015). Consistent with these various roles of  
396 GLT1, we observed that decreasing GLT1 levels in M1 layer 2/3 astrocytes triggered an increase  
397 in the proportion of active neurons during the movement epoch of the task. Moreover, the neuronal  
398 populations failed to form an ensemble of highly correlated neurons, which has previously been  
399 associated with motor learning (Peters et al., 2014). GLT1 mice failed to learn a stereotyped and  
400 precise lever push movement but showed preserved hit/miss performance in the task. This  
401 phenotype is similar to the motor learning deficit observed after pre-learning M1 lesions in rodents  
402 (Kawai et al., 2015; Peters et al., 2014). We also show here that GLT1 reduction triggers complex  
403 changes in neuronal activity, including not only increased proportions of active neurons with  
404 reduced inter-neuronal correlations but also reduced population encoding of movement trajectory  
405 and altered single neuron encoding of task parameters.

406 In contrast, astrocyte-specific Gq signaling activation in M1 astrocytes triggered an increase  
407 in neuronal signal correlation that appeared to be non-informative. This suggests a crucial role for  
408 astrocytes in decorrelating neurons through Gq-dependent mechanisms. The behavioral phenotype  
409 was accompanied by a significant increase in response delay, decrease in the fraction of successful  
410 trials (hit rate) and decrease in stereotypy of the push trajectory. The failure of Gq-activated  
411 astrocytes to decorrelate neuronal activity in M1 layer 2/3 during motor learning may affect  
412 downstream neurons in charge of task execution, leading to delayed responses and reduced task  
413 performance. The behavioral phenotype was rapidly improved when astrocyte-specific Gq  
414 activation was stopped, suggesting that the perturbation was transient and reversible, and affected  
415 mechanisms of execution during motor learning rather than learning *per se*. The response time was  
416 the task parameter that showed the largest change following Gq activation of M1 astrocytes, and

417 was greatly improved but not totally restored in the CNO withdrawal group. One hypothesis would  
418 be that the Gq-DREADD construct by itself (without CNO) had an effect. We thus performed a  
419 control experiment with Gq-DREADD mice injected with saline throughout the learning of the  
420 task, and did not see any difference from the control group. Another factor could be the existence  
421 of a lasting effect of the CNO despite withdrawal, either by direct residual presence in the cortex  
422 or by indirect effect on task performance through lasting functional or structural cellular changes.

423 Gq-GPCR is known to trigger intracellular calcium elevation through IP3-induced calcium  
424 release from the ER (Agulhon et al., 2013; Clapham, 2007; Mizuno and Itoh, 2009). We found  
425 that M1 astrocyte Gq activation was associated *in vivo* with an increase in intracellular calcium,  
426 likely to trigger a saturation of calcium signals and consequently a decrease in frequency of  
427 calcium events. This result is consistent with a recent study demonstrating by similar methods a  
428 decrease in calcium dynamics in Gq activated cortical astrocytes (Vaidyanathan et al., 2021). We  
429 note that although Gq-DREADD is currently one of the most relevant tools available to study  
430 astrocyte Gq pathway activation and to modulate astrocyte function; how accurately it reflects Gq  
431 pathway activation physiologically *in vivo* remains to be determined.

432 It was demonstrated that calcium signaling inhibition in hippocampal astrocytes prevented the  
433 diversity of neuronal presynaptic strengths (Letellier et al., 2016). Moreover, a study showed that  
434 reduction of astrocyte calcium signals in the striatum greatly increased the inter-neuronal  
435 correlation of striatal medium spiny neurons during non-grooming episodes (Yu et al., 2018). Our  
436 finding that astrocytic Gq activation and the associated reduction of astrocyte calcium dynamics  
437 increase non-encoding neuronal correlations is consistent with these studies. Together, they  
438 support a role for astrocytes in the maintenance of neuronal decorrelation and synaptic strength  
439 heterogeneity.

440 Given our finding that modifications of astrocyte gene expression and calcium events are  
441 associated with motor learning, one possibility is that astrocyte manipulations may disrupt  
442 astrocyte-neuron plasticity during learning. In support of this idea, we observed that decrease in  
443 astrocyte GLT1 levels and activation of astrocyte Gq signaling both prevented a number of gene  
444 expression changes during motor learning. Our study also revealed that activation of astrocyte Gq  
445 signaling triggered an increase in *Slc1a2*/GLT1 expression. Gq activation thus may be expected to  
446 have contrasting effects compared to GLT1 inhibition in M1 astrocytes. While some effects were

447 symmetrical, others were not, indicating that balanced astrocyte-neuron activity is critical for  
448 proper operation of brain circuits.  
449



## 450 MATERIAL & METHODS

### 451 Experimental Model

452 All experimental procedures performed on mice were approved by the Massachusetts  
453 Institute of Technology Animal Care and Use Committee, and conformed to National Institutes of  
454 Health guidelines for the Care and Use of Laboratory Animals. Adult mice (2 to 4 months old,  
455 C57BL/6J background) were housed on 12-hour light/dark cycle, group housed before surgery and  
456 singly housed afterwards. Male and female mice were used. The following mouse lines were used:  
457 C57BL/6J wild-type (JAX Stock #000664, Jackson Laboratory, Bar Harbor, ME),  
458 CaMKII;mTTA;GCAMP6s (mTTA;GCAMP6s: Ai94(TITL-GCaMP6s)-D;ROSA26-ZfTA, JAX  
459 Stock #024112, and CaMKII-cre: B6.Cg-Tg(Camk2a-cre)T29-1Stl/J, JAX Stock #005359),  
460 GFAP;GCaMP5G (GFAP-cre: B6.Cg-Tg(Gfap-cre)77.6Mvs/2J, JAX Stock #024098 and  
461 GCaMP5G, Polr2atm1(CAG-GCaMP5g,-tdTomato)Tvr, JAX Stock #024477),  
462 Aldh111;GCaMP6f-Lck (Aldh111-cre: B6;FVB-Tg(Aldh111-cre)JD1884Htz/J, JAX Stock  
463 #023748, and GCaMP6f-Lck: C57BL/6N-Gt(ROSA)26Sortm1(CAG-GCaMP6f)Khakh/J, JAX  
464 Stock #029626). The GLT-1 flox line (Cui et al., 2014) was a gift from Kohichi Tanaka.

465

### 466 Stereotactic virus injection and craniotomy

467 Surgeries were performed aseptically, under isofluorane anesthesia while maintaining body  
468 temperature at 37.5C. Mice were given preemptive analgesia (slow release buprenex,  
469 subcutaneous, 0.1mg/kg). Scalp hairs were removed with hair-remover cream, skin was sterilized  
470 with 70% ethanol and betadine, and portion of the scalp was removed. Mice were head-fixed in a  
471 stereotaxic frame (51725D, Stoelting Co., Wood Dale, IL). A 3mm diameter round craniotomy  
472 was performed over the left motor cortex (0.3mm anterior and 1.5mm lateral to bregma) and a  
473 200nL volume of virus solution (titer of 10-12 virus molecules per ml) was injected 300µm below  
474 the pial surface at 50nL/min with a thin glass pipette and a stereotaxic injector (QSI 53311,  
475 Stoelting). Following each injection, the glass pipette was left in place for 15 additional minutes  
476 and was then slowly withdrawn to avoid virus backflow. The following viruses were used: AAV8-  
477 GFAP-hM3D(Gq)-mCherry (UNC Vector Core), AAV5.GFAP.Cre.WPRE.hGH (Penn Vector  
478 Core, AV-5-PV2408), AAV1.Syn.GCaMP6s.WPRE.SV40 (Penn Vector Core, AV-1-PV2824).  
479 Finally, a cranial window made of 3 round coverglasses (1x 5mm diameter CS-5R, and 2x 3mm  
480 diameter CS-3R, Warner Instruments, Hamden, CT) glued together with UV-cured adhesive

481 (NOA 61, Norland, Jamesburg, NJ) was implanted over the craniotomy and sealed with dental  
482 cement (C&B Metabond, Parkell, Brentwood, NY). For head fixation during the behavioral task  
483 and/or calcium imaging, a headplate was also affixed to the skull using dental cement (C&B  
484 Metabond, Parkell). Postoperative analgesic was provided (Meloxicam, subcutaneous, 1mg/kg)  
485 and recovery was monitored for a minimum of 72 hours after surgery. Animals were allowed to  
486 recover for at least five days before starting the water restriction for behavioral experiments. Upon  
487 completion of experiments, we verified that targeting of the motor cortex region was successful  
488 by immunohistochemical techniques and fluorescence confocal imaging. Animals for which viral  
489 delivery was mis-targeted or failed were excluded.

490

### 491 **Behavioral testing**

492 Water restricted mice were head fixed and trained daily on the lever push task (Peters et al.,  
493 2014), modified as follows. The lever was built using a piezoelectric flexible force transducer  
494 (LCL-113G, Omega Engineering, Norwalk, CT) attached to a brass rod and could be reached  
495 easily by mice using their right paw. Another fixed brass rod was placed in front of the left paw.  
496 The voltage from the force transducer, which is proportional to the lever position, was  
497 continuously recorded. Lever press was defined as crossing of a 1mm threshold. A tone marked  
498 the beginning of a trial, with a 5 sec response period. A lever press past the threshold triggered a  
499 6 $\mu$ L water reward and the start of a 2.62s reward time followed by an inter-trial interval (ITI).  
500 Failure to press during the 5s response period triggered a loud white noise and a 2.62s timeout  
501 period followed by the ITI. Lever presses during the ITI were punished by delaying the start of the  
502 next trial until a full second of time passed without any lever movement. The system was controlled  
503 by MATLAB (MathWorks, Natick, MA) using the Psych-Toolbox.

504

### 505 **CNO administration**

506 CNO (Enzo Life Sciences, Farmingdale, NY) was dissolved in saline injectable sterile  
507 solution (0.9% sodium chloride) at a low 0.1mg/kg concentration. The CNO solution or saline  
508 control was intraperitoneally injected 30 min before each training session. The CNO concentration  
509 used was very low compared to published studies and did not induce any seizure.

510

### 511 **Two-photon microscopy**

512 Mice were head fixed and GCaMP fluorescence imaging of the left motor cortex (0.3mm  
513 anterior and 1.5mm lateral to bregma) was performed through the cranial window, 2-6 weeks post  
514 virus injection and after 3 days of habituation (consisting in daily 10min passive sessions). A  
515 Prairie Ultima IV two-photon microscopy system was used with a galvo-galvo scanning module  
516 (Bruker, Billerica, MA). 910nm wavelength excitation light was provided by a tunable Ti:Sapphire  
517 laser (Mai-Tai eHP, Spectra-Physics, Milpitas, CA) with dispersion compensation (DeepSee,  
518 Spectra-Physics). For collection, GaAsP photomultiplier tubes (Hamamatsu, Bridgewater, NJ)  
519 were used. Images were acquired using PrairieView acquisition software.

520 *GCaMP6f-lck*: to detect all astrocyte calcium events including smaller and faster ones, we  
521 used a 25x/1.05 NA microscope objective (Nikon) combined with 4x optical zoom and acquired  
522 image sequences at 11Hz for 10min during each novice or expert training session of awake mice  
523 performing the lever push task. Three 300x150 pixel (80.3 x 40.2  $\mu\text{m}$ ) rectangular fovs were  
524 imaged per 10min session, with each fov imaged for 200s (1/3 of the session) sequentially.

525 *GCaMP6s*: A 16x/0.8 NA microscope objective (Nikon, Tokyo, Japan) was combined with  
526 2x optical zoom to achieve simultaneous imaging of a large number of neuronal somas, and image  
527 sequences were acquired at 5Hz. A 521x236 pixel (274 x 274  $\mu\text{m}$ ) square field of view (fov) was  
528 imaged for 10min during each expert training session of awake mice performing the lever push  
529 task.

530 *GCaMP5G*: A 16x/0.8 NA microscope objective (Nikon) was combined with 2x optical zoom  
531 to achieve simultaneous imaging of a large number of astrocytes, and image sequences were  
532 acquired at 5Hz. A 521x236 pixel (274 x 274  $\mu\text{m}$ ) square fov was imaged for each 10min passive  
533 imaging session in awake untrained mice.

534

### 535 **Astrocyte activity image analysis**

536 Astrocyte calcium activity during novice or expert training sessions of awake mice performing  
537 the lever push task was analyzed in ALDH1L1; GCaMP6f-lck mice as follow.

538 *Motion correction*. After acquisition, time-lapse imaging sequences were corrected for x and  
539 y movement using the template-matching NoRMCorre algorithm(Pnevmatikakis and  
540 Giovannucci, 2017).

541 *Event detection*. Spatiotemporal events were detected using the AQUA algorithm (Wang et  
542 al., 2019). Briefly: fluorescence signals 2 standard deviations above baseline (F0) and at least 16

543 pixels ( $= 1.145 \mu\text{m}^2$ ) in size were identified. Foreground signals in neighboring pixels in the  
544 spatiotemporal directions (XYZ) were then grouped into an event based on similarity in onset time,  
545 offset time, and proximity. The total pixels in the XYZ planes that are grouped together are  
546 considered as an event and are used to calculate event features. Z-scores for each event were  
547 calculated from the average of all normalized pixel values in the event and events with Z-scores  
548 less than 3 were considered as noise and excluded from the analysis.

549 *Number of events.* For each training session, XYZ events were detected as described above  
550 from each fov and the total number of events detected in the three 200s sequences was summed to  
551 yield the total number of events for the 10min imaging/behavior session.

552 *Event area.* The area of the event was calculated by measuring the area of the spatial footprint  
553 of the XYZ event in the XY direction.

554 *Event amplitude.* The amplitude of an XYZ event was calculated as the maximum detected  
555 DF/F0 for the XY event within the event time period (i.e., the maximum across the Z dimension),  
556 with  $DF/F0 = 100*(F - F0)/F0$ , where F is the average XY signal and F0 is the baseline  
557 fluorescence value for the entire video.

558 *Percentage of trials with coincident events.* Trials with coincident events were detected first  
559 by identifying the closest event that occurred after the lever push, and then determining whether  
560 one or more events also occurred during this movement-associated event.

561 *Trial-averaged activity.* A single DF/F0 vector for the entire imaging session was generated  
562 for each event using the AQuA package. Briefly, this consisted in removing contributions from  
563 other events, which were then imputed with nearby values. The trial-averaged activity during  
564 movement for each successful trial was defined as the average DF/F0 value across all events during  
565 a 2s epoch starting 1s before movement onset.

566 Changes in astrocyte calcium induced by Gq pathway activation were analyzed in GFAP;  
567 GCaMP5G mice as follow. After acquisition, time-lapse imaging sequences were corrected for x  
568 and y movement using the template-matching ImageJ plugins. Regions of interests (ROI) were  
569 automatically identified using CaSCaDe (Agarwal et al., 2017). The baseline fluorescence F0 was  
570 calculated as the 25<sup>th</sup> percentile.  $DF/F0 (= 100*(F - F0)/F0)$  was calculated where F is the ROI  
571 average fluorescence and F0 the baseline fluorescence. DF/F0 peaks with values three standard  
572 deviations above the average DF/F0 were considered as calcium elevation events. The event  
573 amplitude was defined as its maximum DF/F0 value.

574

## 575 **Neuronal activity image analysis**

576 GCaMP6s fluorescence from the upper layers of the left motor cortex was acquired as  
577 described above in CaMKII;mTTA;GCAMP6s transgenic mice or alternatively,  
578 AAV1.Syn.GCaMP6s.WPRE.SV40 injected wildtype mice. We used GCaMP6s for this study  
579 due to its higher SNR that can better capture the motion information encoded in M1 neurons, and  
580 especially, compared to GCaMP6f, its larger response amplitude, lower variability and thus greater  
581 single-spike detectability when used to infer spikes (Huang et al., 2019; Wei et al., 2020). After  
582 acquisition, time-lapse imaging sequences were corrected for x and y movement using template-  
583 matching ImageJ plugins. Regions of interests (ROI) were automatically identified using Suite2P  
584 (Pachitariu et al., 2016) and then manually curated. Alternatively, neuronal ROIs were manually  
585 selected. The fluorescence intensity in time for each ROI was then averaged. The  $DF/F_0$  ( $= 100*(F$   
586  $- F_0)/F_0$ ) was calculated where  $F$  is the average signal and  $F_0$  the mode of the signal.

587 *Average activity.* Activity during movement or during ITI for each successful trial was defined  
588 respectively as the average  $DF/F_0$  across a 1s epoch starting at movement onset or as the average  
589  $DF/F_0$  across the final 1s of the ITI (no movement). The “average activity” of a neuron was  
590 calculated as the average across all the successful trials of the activity during movement as defined  
591 above.

592 *Movement related active neurons.* For each trial, a neuron was considered “active” if the  
593 maximum  $DF/F_0$  during movement was two standard deviations above the average  $DF/F_0$  during  
594 ITI. Percentage of movement related neurons was calculated for each trial and then averaged across  
595 all trials.

596 *Neuron-to-neuron correlation.* Neurons active for more than 10% of the trials were included  
597 in the analysis. For each neuron, activity data vectors during movement for all trials were  
598 concatenated into one vector. The pairwise distance correlation coefficient of two vectors was then  
599 computed to estimate neuron-to-neuron correlation.

600 *Behavioral encoding model.* We used encoding models to test and compare the accuracy of  
601 using different behavior variables to predict the variability in the neuronal activity during the lever  
602 push task trials in fully trained mice. We employed a Generalized Linear Model (GLM) as  
603 described in Engelhard et al., 2019 (Engelhard et al., 2019) modified as follow (see also Fig. 8A).  
604 Behavioral events, lever trajectory and neuronal activity ( $DF/F$ ) during a 5s period after the start

605 of each correct trial were used. For each training session, data vectors for all trials were  
606 concatenated into one vector before fitting the model. We extracted 7 basic features of the  
607 behavioral data in the model, and further expanded them temporally to facilitate a linear model.  
608 Three types of predictors were used: events, trial constants and continuous variables, as follows.  
609 Two events, start of trial and reward were included (reward was immediately given when the lever  
610 was pushed past the threshold). These events were converted into continuous variables with the  
611 same sampling rate as the neuronal activity, by convolving each with a 7-degrees-of-freedom  
612 regression spline basis set. Trial constants were single variables specific to a trial, including trial  
613 status (hit/miss, scored as 1 or 0 respectively) and response time as a number (time in s). These  
614 trial constants were converted to timeseries by convolving with a step function lasting the duration  
615 of the trial. Continuous variables included lever trajectory, lever speed and lever motion  
616 (“moving”), each raised to a 3<sup>rd</sup> degree polynomial. A special case was lever motion, which was  
617 an in-trial step function that was set to 1 before the movement onset and 0 after onset. This  
618 predictor encoded whether or not a movement was occurring, but did not differentiate how long  
619 the movement epoch was for each trial (details of predictor transformation similar to Engelhard et  
620 al., 2019). The expanded predictors were scaled (z-scored) and fitted to a linear model for each  
621 neuron, regularized with an elastic net penalty. The accuracy of each GLM model was assessed by  
622 5-fold splits cross-validation (80% of data for training set, 20% for testing set). The encoding  
623 power  $R^2$  was calculated for each prediction from the fitted model. We quantified the relative  
624 contribution of each behavioral variable to single neuron activity by determining how the  
625 performance of the encoding model was reduced (decrease of  $R^2$ ) when each variable was excluded  
626 of the predictor set of the model, the model was kept as-is while setting the weights of the excluded  
627 feature to 0. When excluding a variable, its derivative/expanded predictors were taken out as well.

628 *Decoding analysis.* To evaluate and compare the capacity of M1 neurons to encode the  
629 forelimb push trajectory, we tested a decoding model to predict the push trajectory from the  
630 neuronal population activity. The calcium activity (DF/F) was deconvolved with an adaptive  
631 kernel to obtain an estimate of spiking activity (Vogelstein et al., 2010). We fitted a linear decoding  
632 model to the entire duration (600s) of each training session, as well as to concatenated push  
633 trajectories alone, to predict the forelimb push trajectory from population spiking activity of the  
634 most informative 20 recorded M1 layer 2/3 neurons for each session. After evaluation of various  
635 M1 decoding models, we chose the support vector regression (SVR) model for measuring the

636 encoding information in M1 neurons for its stability, (i.e. higher reliability with random split  
637 validation), which allowed us to compare neuron encoding capacities of populations from different  
638 animals in different groups. Specifically, a SVR model with radial basis function (RBF) kernel  
639 was used. This model has two main hyper-parameters:  $\gamma$ , the scaling parameter of the kernel, and  
640  $C$ , the regularization parameter. They were optimized through grid search for the average  
641 prediction performance (as discussed below) across all cases in all treatment groups, and the same  
642 hyper-parameters were used for all cases ( $\gamma = 1E-4$ ,  $C = 12$ ). For each session, a continuous  
643 segment of time making up 10% of the entire session starting at a randomized time point (typically,  
644 60s segment in a 600s training session) was used as the test period for model fitting, during which  
645 both behavioral and neuronal data were taken as the test dataset. The rest of the data was spliced  
646 together as the training set. To quantify the similarity between the model predicted trajectory and  
647 the actual trajectory, we used a modified version of the Non-Parametric Entropy Estimation  
648 Toolbox (NPEET) package (Ver Steeg and Galstyan, 2013). Briefly, we used a continuous  
649 estimation of mutual information by the average data point distance to the  $k$ -th neighbor (usually  
650 used with  $k = 3$ ). This mutual information between predicted trajectory and actual trajectory was  
651 used as the metric of encoding capacity of M1 neuron populations.

652

### 653 **Immunohistochemistry**

654 Mice were transcardially perfused with 0.9% saline followed by 4% paraformaldehyde (PFA)  
655 in PBS. Coronal sections were cut to a thickness of 50 $\mu$ m using a vibratome (VT1200S, Leica,  
656 Wetzlar, Germany) and incubated for 1h in blocking solution (0.1% Triton + 3% BSA in PBS),  
657 then overnight in blocking solution with the following primary antibody: 1:1000 mouse anti S-100  
658  $\beta$  subunit (S2532, Sigma-Aldrich, St. Louis, MO). Sections were washed and then incubated for  
659 2h in blocking solution with the following secondary antibody at a 1:500 dilution: goat anti-mouse  
660 647nm (A21235, ThermoFischer, Waltham, MA). Sections were washed in PSB, then mounted on  
661 slides in hard set mounting medium containing 4,6-diamidino-2-phenylindole (DAPI)  
662 (Vectashield, H-1500, Vector Laboratories, Burlingame, CA). A confocal system (TCS SP8,  
663 Leica) was used to image the fluorescence of GCaMPs, mCherry and S100b immunostaining,  
664 using 10 $\times$ /0.40, 20 $\times$ /0.75, or 63 $\times$ /1.40 objectives (magnification/numerical aperture, Leica) and  
665 the LAS X Acquisition Software (Leica).

666

## 667 **Western Blot**

668 Mice were deeply anesthetized under isoflurane, decapitated and their brain immediately  
669 extracted and dissected on ice-cold 0.9% saline. Cortices were dissected (~4mm<sup>3</sup> samples) and  
670 meninges removed. Left and right M1 cortex biopsies were flash frozen and stored at -80C. Frozen  
671 samples were later homogenized in ice-cold RIPA buffer (#89901, ThermoFisher) supplemented  
672 with phosphatase inhibitors (PhosSTOP, Roche, Indianapolis, IN) and protease inhibitors (cOmplete, Mini, EDTA-free, Roche) using a high-speed homogenizer (Fast-Prep-24 5G  
673 Instrument, MP Biomedicals, Irvine, CA). BCA protein assay kit (ThermoFisher Pierce BCA  
674 Protein Assay) was used to determine the protein concentration. After denaturation at 95C for 10  
675 min, samples were loaded on 4–15% polyacrylamide gels (BioRad Laboratories, Hercules, CA),  
676 transferred to PVDF membranes (MilliporeSigma, Burlington, MA), and immunoblotted for  
677 protein expression using the following antibodies: guinea pig anti-GLT1 at 1:25,000 (Millipore  
678 AB1783) and mouse anti-beta actin at 1:20,000 (Sigma-Aldrich A1978), and the following  
679 fluorescent secondaries: donkey anti-rabbit IRDye 800CW (LI-COR, Lincoln, NE) at 1:10,000  
680 and Goat anti-Mouse IRDye 680RD (LI-COR). Immunoreactive bands were imaged with LI-COR  
681 Odyssey and quantified using ImageJ software. Protein levels were normalized to Actin levels.  
682 Normalized values were standardized by using the ratio of the left hemisphere, injected with viral  
683 solution, to the right, non-injected, hemisphere.

685

## 686 **Quantitative RTqPCR**

687 Left M1 cortices were extracted as described above and homogenized in TRIzol (Invitrogen,  
688 Waltham, MA) using a high-speed homogenizer (MP Biomedicals Fast-Prep-24 5G Instrument).  
689 Total RNA was isolated using phenol-chloroform extraction and then purified and concentrated  
690 using ethanol precipitation and washing on a silica column (RNA Clean & Concentrator-5, Zymo  
691 Research, Irvine, CA). Total RNA samples were reverse transcribed (ThermoFisher SuperScript  
692 IV Vilo). The RTqPCR were performed using a QuantStudio™ 3 System (ThermoFisher) with  
693 SYBR Green enzyme mix (ThermoFisher PowerUp SYBR Green Master Mix). The following  
694 primers were used: Glyceraldehyde 3-phosphate dehydrogenase (*Gapdh*) Forward:  
695 AAGAGAGGCCCTATCCCAAC, Reverse: GCAGCGAACTTTATTGATGG; peptidylprolyl  
696 isomerase A (*Ppia*) Forward: GTGACTTTACACGCCATAATG, Reverse:  
697 ACAAGATGCCAGGACCTGTAT; solute carrier family 1, member 2 (*Slc1a2*) Forward:



698 GAACGAGGCCCTGAAGAAA, Reverse: CCTGTTCACCCATCTTCCCC; solute carrier  
699 family 1, member 3 (*Slc1a3*), Forward: GTAACCCGGAAGAACCCTG, Reverse:  
700 GTGATGCGTTTGTCCACACC; solute carrier family 6, member 1 (*Slc6a1*), Forward:  
701 CACTCTGTTCTGGTGTCCCC, Reverse: GGAAGCTTAATGCCAGGGT; solute carrier  
702 family 6, member 11 (*Slc6a11*), Forward: ATGATGCCCTCTCTCCACT, Reverse:  
703 TACCACGGCTGTCACAAGAC; solute carrier family 6, member 6 (*Slc6a6*), Forward:  
704 TTCAGACAACAGACACGCGA, Reverse: CTCGGCAGCAACCAGGTC; testican-2 (*Spock2*),  
705 Forward: AGGTCACATTTTCAGCCACGA, Reverse: TTGATGTCCTTCCCTCCACC, basigin  
706 (*Bsg*) Forward: GGCGGGCACCATCCAAA, Reverse: CCTTGCCACCTCTCATCCAG. Every  
707 sample was run in technical duplicate or triplicate. Relative expression was quantified using the  
708  $\Delta\Delta C_p$  method.

709

## 710 **RNAseq**

711 Wild-type mice were water restricted and then trained for 0 (naive), 3 (novice) or 19 (expert)  
712 days. To match stress levels, all three groups were water-restricted and head-fixed for the same  
713 duration as the expert mice. M1 cortices were then dissected as described above, but using ice cold  
714 ACSF (120 mM, KCL 3mM, NaHCO<sub>3</sub> 26.2mM, MgSO<sub>4</sub> 2mM, CaCl<sub>2</sub> 0.2mM, D-Glucose  
715 11.1mM, HEPES 5mM) bubbled with oxygen and supplemented with AP5 (0.02mM) and CNQX  
716 (0.02mM) instead of PBS. Cells were dissociated using Miltenyi Biotec Neural Tissue  
717 Dissociation kit – Postnatal Neurons (130-094-802) and gentleMACS Dissociator following  
718 manufacturer protocols. Cell suspension was depleted of microglia and myelin debris (Myelin  
719 Removal Kit, 130096733, Miltenyi Biotec, Bergisch Gladbach, Germany), then astrocytes were  
720 isolated using the Miltenyi Biotec’s anti-ACSA-2 magnetic cell sorting kit and protocol (Miltenyi  
721 Biotec, 130097678). RNA was purified and concentrated with proteinase K cell digestion, ethanol  
722 precipitation and washing on a silica column (Zymo Quick-RNA FFPE). RNA concentration and  
723 quality were assessed with Agilent 2100 Bioanalyzer. Indexed cDNA libraries were generated  
724 using the SMARTer Stranded Total RNA-Seq Kit v2 (#634411, Illumina, San Diego, CA) and  
725 multiplexed sequencing was performed on Illumina HiSeq 2000. Reads were aligned to the mouse  
726 mm9 genome using the TopHat sliced read mapper (Trapnell et al., 2012). Fragment counts were  
727 obtained using the Cufflinks pipeline (Trapnell et al., 2012). Genes with fragment counts above  
728 20 kpm were selected for further analysis. To remove unwanted variation, normalization was

729 implemented using the Bioconductor packages EDASeq (Risso et al., 2011) and RUVSeq (Risso  
730 et al., 2014). Differential expression analysis was performed using Bioconductor package EdgeR  
731 (Robinson et al., 2009). The gene ontology (GO) analysis of DEGs was performed using  
732 PANTHER (Mi et al., 2019). The Gene Set Enrichment Analysis was performed using  
733 Bioconductor EdgeR Camera package (Wu and Smyth, n.d.). The data is available at the Gene  
734 Expression Omnibus repository (GEO: GSE156661).

735

### 736 **Statistical Analysis**

737 All experiments included at least three replicates, with each replicate being a mouse-averaged  
738 value if not otherwise stated. Line plots and bar graphs show mean  $\pm$  standard error of the mean  
739 (SEM). Box plot bars represents median, the box extends from the 25th to 75th percentiles, and  
740 whiskers show 10th to the 90<sup>th</sup> percentile. No statistical methods were used to pre-determine  
741 sample size. We used sample sizes similar to literature in the field. Sample sizes provided at least  
742 80% power to detect the experimental effect. For datasets with two data groups, groups were  
743 compared using Student's two-tailed t-tests or Mann-Whitney U tests. Paired comparisons were  
744 performed with paired t-test or paired Wilcoxon rank sum test. Comparisons of cumulative  
745 distributions were performed using a nonparametric Kolmogorov-Smirnov test. For datasets with  
746 three or more data groups, groups were compared using one-way ANOVA with multiple  
747 comparisons test. Datasets with different treatment groups or different models built on grouped  
748 data were compared with (treatment/model) x astrocyte group two-way ANOVA, either with or  
749 without linear mixed model for individual animal effects, as indicated in the text. Results of  
750 statistical tests are reported in the figure legends. Values and replicate numbers are defined in the  
751 figure legends.

752

### 753 **Materials Availability**

754 Further information and requests about data, resources and reagents should be directed to and  
755 will be fulfilled by Mriganka Sur ([msur@mit.edu](mailto:msur@mit.edu)).

756

757

## 758 **ACKNOWLEDGEMENTS**

759           We thank Vaibhavi Shah, Taylor Johns, Vincent Pham, Liadan Gunter and Austin Sullins  
760 for their technical help. We thank all members of the Sur lab for their support. We thank the MIT  
761 Division of Comparative Medicine for animal care. We thank the MIT BioMicroCenter for  
762 performing the RNAseq, and the Picower Institute Bioinformatics Core Facility for analysis  
763 support. We thank Kohichi Tanaka for providing the GLT1 flox mouse line, which contributed  
764 crucially to this study. This work was supported by the NIH (grants R01EY028219,  
765 R01DA049005), MURI-ARO Proposal 78249-NS-MUR, and the Simons Foundation Autism  
766 Research Initiative through the Simons Center for the Social Brain (M.S.). C.D. was supported by  
767 awards from the Bettancourt-Schueller Foundation and Philippe Foundation, and by fellowships  
768 from the Simons Center for the Social Brain and Picower Foundation. K.L. was supported by the  
769 Rettsyndrome.org foundation's mentored training fellowship #3213. J.S. was supported by a NIH  
770 Ruth L. Kirschstein Postdoctoral NRSA (F32NS110481).

771

## 772 **AUTHOR CONTRIBUTIONS**

773           C.D. and M.S. designed the experiments. C.D. performed the behavioral experiments,  
774 stereotaxic injection and cranial window surgeries, M1 microdissections, immunohistochemistry,  
775 western blotting and two-photon calcium imaging experiments and analysis. P.G. performed  
776 behavioral experiments, astrocyte purification and RNA extractions. C.D. processed and analyzed  
777 the RNA-seq data. J.S. performed cranial window surgeries and astrocyte imaging experiments  
778 and analyzed the data. C.D. and K.L. processed and analyzed the two-photon neuronal imaging  
779 data. K.L. performed the decoding and encoding analysis. C.D., K.L. and M.S wrote the  
780 manuscript.

781

## 782 **COMPETING INTERESTS**

783           The authors declare no competing financial interests.

784

785 **REFERENCES**

786

787 Ackerman SD, Perez-Catalan NA, Freeman MR, Doe CQ. 2021. Astrocytes close a motor circuit  
788 critical period. *Nat 2021 5927854* **592**:414–420. doi:10.1038/s41586-021-03441-2

789 Adamsky A, Kol A, Kreisel T, Doron A, Ozeri-Engelhard N, Melcer T, Refaeli R, Horn H,  
790 Regev L, Groysman M, London M, Goshen I. 2018. Astrocytic Activation Generates De  
791 Novo Neuronal Potentiation and Memory Enhancement. *Cell* **174**:59-71.e14.

792 doi:10.1016/j.cell.2018.05.002

793 Agarwal A, Wu PH, Hughes EG, Fukaya M, Tischfield MA, Langseth AJ, Wirtz D, Bergles DE.

794 2017. Transient Opening of the Mitochondrial Permeability Transition Pore Induces

795 Microdomain Calcium Transients in Astrocyte Processes. *Neuron* **93**:587-605.e7.

796 doi:10.1016/j.neuron.2016.12.034

797 Agulhon C, Boyt KM, Xie AX, Friocourt F, Roth BL, Mccarthy KD. 2013. Modulation of the

798 autonomic nervous system and behaviour by acute glial cell Gq protein-coupled receptor

799 activation in vivo. *J Physiol* **591**:5599–5609. doi:10.1113/jphysiol.2013.261289

800 Agulhon C, Sun MY, Murphy T, Myers T, Lauderdale K, Fiacco TA. 2012. Calcium signaling  
801 and gliotransmission in normal vs. Reactive astrocytes. *Front Pharmacol*.

802 doi:10.3389/fphar.2012.00139

803 Aida T, Yoshida J, Nomura M, Tanimura A, Iino Y, Soma M, Bai N, Ito Y, Cui W, Aizawa H,

804 Yanagisawa M, Nagai T, Takata N, Tanaka KF, Takayanagi R, Kano M, Götz M, Hirase H,

805 Tanaka K. 2015. Astroglial glutamate transporter deficiency increases synaptic excitability

806 and leads to pathological repetitive behaviors in mice. *Neuropsychopharmacology* **40**:1569–

807 1579. doi:10.1038/npp.2015.26

808 Araque A, Parpura V, Sanzgiri RP, Haydon PG. 1999. Tripartite synapses: Glia, the

809 unacknowledged partner. *Trends Neurosci*. doi:10.1016/S0166-2236(98)01349-6

810 Arizono M, Inavalli VVGK, Panatier A, Pfeiffer T, Angibaud J, Levet F, Ter Veer MJT, Stobart

811 J, Bellocchio L, Mikoshiba K, Marsicano G, Weber B, Oliet SHR, Nägerl UV. 2020.

812 Structural basis of astrocytic Ca<sup>2+</sup> signals at tripartite synapses. *Nat Commun* **11**:1–15.

813 doi:10.1038/s41467-020-15648-4

814 Armbruster BN, Li X, Pausch MH, Herlitze S, Roth BL. 2007. Evolving the lock to fit the key to

815 create a family of G protein-coupled receptors potently activated by an inert ligand. *Proc*

- 816 *Natl Acad Sci U S A* **104**:5163–5168. doi:10.1073/pnas.0700293104
- 817 Arnth-Jensen N, Jabaudon D, Scanziani M. 2002. Cooperation between independent  
818 hippocampal synapses is controlled by glutamate uptake. *Nat Neurosci* **5**:325–331.  
819 doi:10.1038/nn825
- 820 Asztely F, Erdemli G, Kullmann DM. 1997. Extrasynaptic glutamate spillover in the  
821 hippocampus: Dependence on temperature and the role of active glutamate uptake. *Neuron*  
822 **18**:281–293. doi:10.1016/S0896-6273(00)80268-8
- 823 Bergles DE, Diamond JS, Jahr CE. 1999. Clearance of glutamate inside the synapse and beyond.  
824 *Curr Opin Neurobiol* **9**:293–298. doi:10.1016/S0959-4388(99)80043-9
- 825 Bernardinelli Y, Azarias G, Chatton JY. 2006. In situ fluorescence imaging of glutamate-evoked  
826 mitochondrial Na<sup>+</sup> responses in astrocytes. *Glia*. doi:10.1002/glia.20387
- 827 Bindocci E, Savtchouk I, Liaudet N, Becker D, Carriero G, Volterra A. 2017. Neuroscience:  
828 Three-dimensional Ca<sup>2+</sup> imaging advances understanding of astrocyte biology. *Science*  
829 (80-) **356**. doi:10.1126/science.aai8185
- 830 Cao X, Li LP, Wang Q, Wu Q, Hu HH, Zhang M, Fang YY, Zhang J, Li SJ, Xiong WC, Yan  
831 HC, Gao YB, Liu JH, Li XW, Sun LR, Zeng YN, Zhu XH, Gao TM. 2013. Astrocyte-  
832 derived ATP modulates depressive-like behaviors. *Nat Med* **19**:773–777.  
833 doi:10.1038/nm.3162
- 834 Chai H, Diaz-Castro B, Shigetomi E, Monte E, Oceau JC, Yu X, Cohn W, Rajendran PS,  
835 Vondriska TM, Whitelegge JP, Coppola G, Khakh BS. 2017. Neural Circuit-Specialized  
836 Astrocytes: Transcriptomic, Proteomic, Morphological, and Functional Evidence. *Neuron*  
837 **95**:531-549.e9. doi:10.1016/j.neuron.2017.06.029
- 838 Chen N, Sugihara H, Kim J, Fu Z, Barak B, Sur M, Feng G, Han W. 2016. Direct modulation of  
839 GFAP-expressing glia in the arcuate nucleus bi-directionally regulates feeding. *Elife* **5**.  
840 doi:10.7554/eLife.18716
- 841 Clapham DE. 2007. Calcium Signaling. *Cell*. doi:10.1016/j.cell.2007.11.028
- 842 Corkrum M, Covelo A, Lines J, Bellocchio L, Pisansky M, Loke K, Quintana R, Rothwell PE,  
843 Lujan R, Marsicano G, Martin ED, Thomas MJ, Kofuji P, Araque A. 2020. Dopamine-  
844 Evoked Synaptic Regulation in the Nucleus Accumbens Requires Astrocyte Activity.  
845 *Neuron* **105**:1036-1047.e5. doi:10.1016/j.neuron.2019.12.026
- 846 Cui W, Mizukami H, Yanagisawa M, Aida T, Nomura M, Isomura Y, Takayanagi R, Ozawa K,

- 847 Tanaka K, Aizawa H. 2014. Glial dysfunction in the mouse habenula causes depressive-like  
848 behaviors and sleep disturbance. *J Neurosci* **34**:16273–16285.  
849 doi:10.1523/JNEUROSCI.1465-14.2014
- 850 Danbolt NC. 2001. Glutamate uptake. *Prog Neurobiol*. doi:10.1016/S0301-0082(00)00067-8
- 851 Di Castro MA, Chuquet J, Liaudet N, Bhaukaurally K, Santello M, Bouvier D, Tiret P, Volterra  
852 A. 2011. Local Ca<sup>2+</sup> detection and modulation of synaptic release by astrocytes. *Nat*  
853 *Neurosci* **14**:1276–1284. doi:10.1038/nn.2929
- 854 Diamond JS, Jahr CE. 1997. Transporters buffer synaptically released glutamate on a  
855 submillisecond time scale. *J Neurosci* **17**:4672–4687. doi:10.1523/jneurosci.17-12-  
856 04672.1997
- 857 Dombeck DA, Graziano MS, Tank DW. 2009. Behavioral/Systems/Cognitive Functional  
858 Clustering of Neurons in Motor Cortex Determined by Cellular Resolution Imaging in  
859 Awake Behaving Mice. doi:10.1523/JNEUROSCI.2985-09.2009
- 860 Doron G, Brecht M. 2015. What single-cell stimulation has told us about neural coding. *Philos*  
861 *Trans R Soc B Biol Sci*. doi:10.1098/rstb.2014.0204
- 862 Durkee CA, Araque A. 2019. Diversity and Specificity of Astrocyte–neuron Communication.  
863 *Neuroscience*. doi:10.1016/j.neuroscience.2018.11.010
- 864 Engelhard B, Finkelstein J, Cox J, Fleming W, Jang HJ, Ornelas S, Koay SA, Thiberge SY, Daw  
865 ND, Tank DW, Witten IB. 2019. Specialized coding of sensory, motor and cognitive  
866 variables in VTA dopamine neurons. *Nature*. doi:10.1038/s41586-019-1261-9
- 867 Filosa A, Paixo S, Honsek SD, Carmona MA, Becker L, Feddersen B, Gaitanos L, Rudhard Y,  
868 Schoepfer R, Klopstock T, Kullander K, Rose CR, Pasquale EB, Klein R. 2009. Neuron-  
869 glia communication via EphA4/ephrin-A3 modulates LTP through glial glutamate transport.  
870 *Nat Neurosci* **12**:1285–1292. doi:10.1038/nn.2394
- 871 Gloor C, Luft AR, Hosp JA. 2015. Biphasic plasticity of dendritic fields in layer V motor  
872 neurons in response to motor learning. *Neurobiol Learn Mem* **125**:189–194.  
873 doi:10.1016/j.nlm.2015.08.009
- 874 Gomez JA, Perkins JM, Beaudoin GM, Cook NB, Quraishi SA, Szoeki EA, Thangamani K,  
875 Tschumi CW, Wanat MJ, Maroof AM, Beckstead MJ, Rosenberg PA, Paladini CA. 2019.  
876 Ventral tegmental area astrocytes orchestrate avoidance and approach behavior. *Nat*  
877 *Commun* **10**. doi:10.1038/s41467-019-09131-y

- 878 Griffiths EJ, Rutter GA. 2009. Mitochondrial calcium as a key regulator of mitochondrial ATP  
879 production in mammalian cells. *Biochim Biophys Acta - Bioenerg.*  
880 doi:10.1016/j.bbabi.2009.01.019
- 881 Harrison TC, Ayling OGS, Murphy TH. 2012. Distinct Cortical Circuit Mechanisms for  
882 Complex Forelimb Movement and Motor Map Topography. *Neuron* **74**:397–409.  
883 doi:10.1016/j.neuron.2012.02.028
- 884 Haydon PG. 2001. Glia: Listening and talking to the synapse. *Nat Rev Neurosci* **2**:185–193.  
885 doi:10.1038/35058528
- 886 Henneberger C, Papouin T, Oliet SHR, Rusakov DA. 2010. Long-term potentiation depends on  
887 release of d-serine from astrocytes. *Nature* **463**:232–236. doi:10.1038/nature08673
- 888 Hennes M, Lombaert N, Wahis J, Van den Haute C, Holt MG, Arckens L. 2020. Astrocytes  
889 shape the plastic response of adult cortical neurons to vision loss. *Glia* **68**:2102–2118.  
890 doi:10.1002/glia.23830
- 891 Holt LM, Olsen ML. 2016. Novel applications of magnetic cell sorting to analyze cell-type  
892 specific gene and protein expression in the central nervous system. *PLoS One* **11**:e0150290.  
893 doi:10.1371/journal.pone.0150290
- 894 Huang L, Knoblich U, Ledochowitsch P, Lecoq J, Reid RC, de Vries SEJ, Buice MA, Murphy  
895 GJ, Waters J, Koch C, Zeng H, Li L. 2019. Relationship between spiking activity and  
896 simultaneously recorded fluorescence signals in transgenic mice expressing GCaMP6.  
897 *bioRxiv*. doi:10.1101/788802
- 898 Huang YH, Sinha SR, Tanaka K, Rothstein JD, Bergles DE. 2004. Astrocyte glutamate  
899 transporters regulate metabotropic glutamate receptor-mediated excitation of hippocampal  
900 interneurons. *J Neurosci* **24**:4551–4559. doi:10.1523/JNEUROSCI.5217-03.2004
- 901 Jackson JG, O'Donnell JC, Takano H, Coulter DA, Robinson MB. 2014. Neuronal activity and  
902 glutamate uptake decrease mitochondrial mobility in astrocytes and position mitochondria  
903 near glutamate transporters. *J Neurosci*. doi:10.1523/JNEUROSCI.3510-13.2014
- 904 Jackson JG, Robinson MB. 2015. Reciprocal regulation of mitochondrial dynamics and calcium  
905 signaling in astrocyte processes. *J Neurosci*. doi:10.1523/JNEUROSCI.2049-15.2015
- 906 Kawai R, Markman T, Poddar R, Ko R, Fantana AL, Dhawale AK, Kampff AR, Ölveczky BP.  
907 2015. Motor Cortex Is Required for Learning but Not for Executing a Motor Skill. *Neuron*  
908 **86**:800–812. doi:10.1016/j.neuron.2015.03.024

- 909 Khakh BS, Deneen B. 2019. The Emerging Nature of Astrocyte Diversity. *Annu Rev Neurosci*.  
910 doi:10.1146/annurev-neuro-070918-050443
- 911 Khakh BS, Sofroniew M V. 2015. Diversity of astrocyte functions and phenotypes in neural  
912 circuits. *Nat Neurosci* **18**:942–952. doi:10.1038/nm.4043
- 913 Kofuji P, Araque A. 2020. G-Protein-Coupled Receptors in Astrocyte–Neuron Communication.  
914 *Neuroscience*. doi:10.1016/j.neuroscience.2020.03.025
- 915 Kol A, Adamsky A, Groysman M, Kreisel T, London M, Goshen I. 2020. Astrocytes contribute  
916 to remote memory formation by modulating hippocampal–cortical communication during  
917 learning. *Nat Neurosci* 1–11. doi:10.1038/s41593-020-0679-6
- 918 Letellier M, Park YK, Chater TE, Chipman PH, Gautam SG, Oshima-Takago T, Goda Y. 2016.  
919 Astrocytes regulate heterogeneity of presynaptic strengths in hippocampal networks. *Proc*  
920 *Natl Acad Sci U S A* **113**:E2685–E2694. doi:10.1073/pnas.1523717113
- 921 Lines J, Martin ED, Kofuji P, Aguilar J, Araque A. 2020. Astrocytes modulate sensory-evoked  
922 neuronal network activity. *Nat Commun* **11**:3689. doi:10.1038/s41467-020-17536-3
- 923 Martin-Fernandez M, Jamison S, Robin LM, Zhao Z, Martin ED, Aguilar J, Benneyworth MA,  
924 Marsicano G, Araque A. 2017. Synapse-specific astrocyte gating of amygdala-related  
925 behavior. *Nat Neurosci* **20**:1540–1548. doi:10.1038/nm.4649
- 926 Martín R, Bajo-Grañeras R, Moratalla R, Perea G, Araque A. 2015. Circuit-specific signaling in  
927 astrocyte-neuron networks in basal ganglia pathways. *Science (80- )* **349**:730–734.  
928 doi:10.1126/science.aaa7945
- 929 Mederos S, Hernández-Vivanco A, Ramírez-Franco J, Martín-Fernández M, Navarrete M, Yang  
930 A, Boyden ES, Perea G. 2019. Melanopsin for precise optogenetic activation of astrocyte-  
931 neuron networks. *Glia* **67**:915–934. doi:10.1002/glia.23580
- 932 Mi H, Muruganujan A, Huang X, Ebert D, Mills C, Guo X, Thomas PD. 2019. Protocol Update  
933 for large-scale genome and gene function analysis with the PANTHER classification system  
934 (v.14.0). *Nat Protoc* **14**:703–721. doi:10.1038/s41596-019-0128-8
- 935 Mizuno N, Itoh H. 2009. Functions and Regulatory Mechanisms of Gq-Signaling Pathways.  
936 *Neurosignals* **17**:42–54. doi:10.1159/000186689
- 937 Musall S, Kaufman MT, Juavinett AL, Gluf S, Churchland AK. 2019. Single-trial neural  
938 dynamics are dominated by richly varied movements. *Nat Neurosci* **22**:1677–1686.  
939 doi:10.1038/s41593-019-0502-4



- 940 Nagai J, Rajbhandari AK, Gangwani MR, Hachisuka A, Coppola G, Masmanidis SC, Fanselow  
941 MS, Khakh BS. 2019. Hyperactivity with Disrupted Attention by Activation of an Astrocyte  
942 Synptogenic Cue. *Cell* **177**:1280-1292.e20. doi:10.1016/j.cell.2019.03.019
- 943 Niederberger E, Schmidtko A, Rothstein JD, Geisslinger G, Tegeder I. 2003. Modulation of  
944 spinal nociceptive processing through the glutamate transporter GLT-1. *Neuroscience*  
945 **116**:81–87. doi:10.1016/S0306-4522(02)00547-X
- 946 Nudo RJ, Milliken GW, Jenkins WM, Merzenich MM. 1996. Use-dependent alterations of  
947 movement representations in primary motor cortex of adult squirrel monkeys. *J Neurosci*  
948 **16**:785–807. doi:10.1523/jneurosci.16-02-00785.1996
- 949 Oliet SHR, Piet R, Poulain DA. 2001. Control of glutamate clearance and synaptic efficacy by  
950 glial coverage of neurons. *Science (80- )* **292**:923–926. doi:10.1126/science.1059162
- 951 Oliveira JF, Sardinha VM, Guerra-Gomes S, Araque A, Sousa N. 2015. Do stars govern our  
952 actions? Astrocyte involvement in rodent behavior. *Trends Neurosci.*  
953 doi:10.1016/j.tins.2015.07.006
- 954 Omrani A, Melone M, Bellesi M, Safiulina V, Aida T, Tanaka K, Cherubini E, Conti F. 2009.  
955 Up-regulation of GLT-1 severely impairs LTD at mossy fibre-CA3 synapses. *J Physiol*  
956 **587**:4575–4588. doi:10.1113/jphysiol.2009.177881
- 957 Pachitariu M, Stringer C, Schröder S, Dipoppa M, Rossi LF, Carandini M, Harris KD. 2016.  
958 Suite2p: beyond 10,000 neurons with standard two-photon microscopy. *bioRxiv* 061507.  
959 doi:10.1101/061507
- 960 Padmashri R, Suresh A, Boska MD, Dunaevsky A. 2015. Motor-skill learning is dependent on  
961 astrocytic activity. *Neural Plast* **2015**. doi:10.1155/2015/938023
- 962 Pardo AC, Wong V, Benson LM, Dykes M, Tanaka K, Rothstein JD, Maragakis NJ. 2006. Loss  
963 of the astrocyte glutamate transporter GLT1 modifies disease in SOD1G93A mice. *Exp*  
964 *Neurol* **201**:120–130. doi:10.1016/j.expneurol.2006.03.028
- 965 Paukert M, Agarwal A, Cha J, Doze VA, Kang JU, Bergles DE. 2014. Norepinephrine controls  
966 astroglial responsiveness to local circuit activity. *Neuron* **82**:1263–1270.  
967 doi:10.1016/j.neuron.2014.04.038
- 968 Perea G, Sur M, Araque A. 2014a. Neuron-glia networks: Integral gear of brain function. *Front*  
969 *Cell Neurosci.* doi:10.3389/fncel.2014.00378
- 970 Perea G, Yang A, Boyden ES, Sur M. 2014b. Optogenetic astrocyte activation modulates

- 971 response selectivity of visual cortex neurons in vivo. *Nat Commun* **5**:1–12.  
972 doi:10.1038/ncomms4262
- 973 Peters AJ, Chen SX, Komiyama T. 2014. Emergence of reproducible spatiotemporal activity  
974 during motor learning. *Nature* **510**:263–267. doi:10.1038/nature13235
- 975 Peters AJ, Liu H, Komiyama T. 2017. Learning in the Rodent Motor Cortex. *Annu Rev Neurosci*  
976 **40**:77–97. doi:10.1146/annurev-neuro-072116-031407
- 977 Pnevmatikakis EA, Giovannucci A. 2017. NoRMCorre: An online algorithm for piecewise rigid  
978 motion correction of calcium imaging data. *J Neurosci Methods* **291**:83–94.  
979 doi:10.1016/j.jneumeth.2017.07.031
- 980 Porter JT, McCarthy KD. 1997. Astrocytic neurotransmitter receptors in situ and in vivo. *Prog*  
981 *Neurobiol* **51**:439–455. doi:10.1016/S0301-0082(96)00068-8
- 982 Poskanzer KE, Molofsky A V. 2018. Dynamism of an Astrocyte In Vivo: Perspectives on  
983 Identity and Function. *Annu Rev Physiol* **80**:143–157. doi:10.1146/annurev-physiol-021317-  
984 121125
- 985 Poskanzer KE, Yuste R. 2016. Astrocytes regulate cortical state switching in vivo. *Proc Natl*  
986 *Acad Sci U S A* **113**:E2675–E2684. doi:10.1073/pnas.1520759113
- 987 Ribot J, Breton R, Calvo CF, Moulard J, Ezan P, Zapata J, Samama K, Moreau M, Bemelmans  
988 AP, Sabatet V, Dingli F, Loew D, Milleret C, Billuart P, Dallérac G, Rouach N. 2021.  
989 Astrocytes close the mouse critical period for visual plasticity. *Science (80- )* **373**:77–81.  
990 doi:10.1126/SCIENCE.ABF5273
- 991 Risso D, Ngai J, Speed TP, Dudoit S. 2014. Normalization of RNA-seq data using factor analysis  
992 of control genes or samples. *Nat Biotechnol* **32**:896–902. doi:10.1038/nbt.2931
- 993 Risso D, Schwartz K, Sherlock G, Dudoit S. 2011. GC-Content Normalization for RNA-Seq  
994 Data. *BMC Bioinformatics* **12**:480. doi:10.1186/1471-2105-12-480
- 995 Robinson MB, Jackson JG. 2016. Astroglial glutamate transporters coordinate excitatory  
996 signaling and brain energetics. *Neurochem Int*. doi:10.1016/j.neuint.2016.03.014
- 997 Robinson MD, McCarthy DJ, Smyth GK. 2009. edgeR: A Bioconductor package for differential  
998 expression analysis of digital gene expression data. *Bioinformatics* **26**:139–140.  
999 doi:10.1093/bioinformatics/btp616
- 1000 Roth BL. 2016. DREADDs for Neuroscientists. *Neuron*. doi:10.1016/j.neuron.2016.01.040
- 1001 Rothstein JD, Dykes-Hoberg M, Pardo CA, Bristol LA, Jin L, Kuncl RW, Kanai Y, Hediger

- 1002 MA, Wang Y, Schielke JP, Welty DF. 1996. Knockout of glutamate transporters reveals a  
1003 major role for astroglial transport in excitotoxicity and clearance of glutamate. *Neuron*  
1004 **16**:675–686. doi:10.1016/S0896-6273(00)80086-0
- 1005 Rothstein JD, Martin L, Levey AI, Dykes-Hoberg M, Jin L, Wu D, Nash N, Kuncl RW. 1994.  
1006 Localization of neuronal and glial glutamate transporters. *Neuron* **13**:713–725.  
1007 doi:10.1016/0896-6273(94)90038-8
- 1008 Rungta RL, Bernier LP, Dissing-Olesen L, Groten CJ, LeDue JM, Ko R, Drissler S, MacVicar  
1009 BA. 2016. Ca<sup>2+</sup> transients in astrocyte fine processes occur via Ca<sup>2+</sup> influx in the adult  
1010 mouse hippocampus. *Glia* **64**:2093–2103. doi:10.1002/glia.23042
- 1011 Salvador S, Chan P. 2007. Toward accurate dynamic time warping in linear time and space.  
1012 *Intell Data Anal* **11**:561–580. doi:10.3233/ida-2007-11508
- 1013 Santello M, Toni N, Volterra A. 2019. Astrocyte function from information processing to  
1014 cognition and cognitive impairment. *Nat Neurosci*. doi:10.1038/s41593-018-0325-8
- 1015 Sasaki T, Ishikawa T, Abe R, Nakayama R, Asada A, Matsuki N, Ikegaya Y. 2014. Astrocyte  
1016 calcium signalling orchestrates neuronal synchronization in organotypic hippocampal slices.  
1017 *J Physiol* **592**:2771–2783. doi:10.1113/jphysiol.2014.272864
- 1018 Scofield MD, Boger HA, Smith RJ, Li H, Haydon PG, Kalivas PW. 2015. Gq-DREADD  
1019 selectively initiates glial glutamate release and inhibits cue-induced cocaine seeking. *Biol*  
1020 *Psychiatry* **78**:441–451. doi:10.1016/j.biopsych.2015.02.016
- 1021 Shigetomi E, Bushong EA, Hausteiner MD, Tong X, Jackson-Weaver O, Kracun S, Xu J,  
1022 Sofroniew M V., Ellisman MH, Khakh BS. 2013. Imaging calcium microdomains within  
1023 entire astrocyte territories and endfeet with GCaMPs expressed using adeno-associated  
1024 viruses. *J Gen Physiol* **141**:633–647. doi:10.1085/jgp.201210949
- 1025 Slezak M, Kandler S, Van Veldhoven PP, Van den Haute C, Bonin V, Holt MG. 2019. Distinct  
1026 Mechanisms for Visual and Motor-Related Astrocyte Responses in Mouse Visual Cortex.  
1027 *Curr Biol* **29**:3120-3127.e5. doi:10.1016/j.cub.2019.07.078
- 1028 Srinivasan R, Huang BS, Venugopal S, Johnston AD, Chai H, Zeng H, Golshani P, Khakh BS.  
1029 2015. Ca<sup>2+</sup> signaling in astrocytes from Ip3r2 <sup>-/-</sup> mice in brain slices and during startle  
1030 responses in vivo. *Nat Neurosci* **18**:708–717. doi:10.1038/nn.4001
- 1031 Stephen TL, Higgs NF, Sheehan DF, Awabdh S Al, López-Doménech G, Arancibia-Carcamo IL,  
1032 Kittler JT. 2015. Miro1 regulates activity-driven positioning of mitochondria within

- 1033 astrocytic processes apposed to synapses to regulate intracellular calcium signaling. *J*  
1034 *Neurosci*. doi:10.1523/JNEUROSCI.2068-15.2015
- 1035 Stobart JL, Ferrari KD, Barrett MJP, Glück C, Stobart MJ, Zuend M, Weber B. 2018. Cortical  
1036 Circuit Activity Evokes Rapid Astrocyte Calcium Signals on a Similar Timescale to  
1037 Neurons. *Neuron* **98**:726–735.e4. doi:10.1016/j.neuron.2018.03.050
- 1038 Suzuki A, Stern SA, Bozdagi O, Huntley GW, Walker RH, Magistretti PJ, Alberini CM. 2011.  
1039 Astrocyte-neuron lactate transport is required for long-term memory formation. *Cell*  
1040 **144**:810–823. doi:10.1016/j.cell.2011.02.018
- 1041 Takayasu Y, Iino M, Shimamoto K, Tanaka K, Ozawa S. 2006. Glial glutamate transporters  
1042 maintain one-to-one relationship at the climbing fiber-Purkinje cell synapse by preventing  
1043 glutamate spillover. *J Neurosci* **26**:6563–6572. doi:10.1523/JNEUROSCI.5342-05.2006
- 1044 Tanaka K, Watase K, Manabe T, Yamada K, Watanabe M, Takahashi K, Iwama H, Nishikawa  
1045 T, Ichihara N, Kikuchi T, Okuyama S, Kawashima N, Hori S, Takimoto M, Wada K. 1997.  
1046 Epilepsy and exacerbation of brain injury in mice lacking the glutamate transporter GLT-1.  
1047 *Science (80- )* **276**:1699–1702. doi:10.1126/science.276.5319.1699
- 1048 Tennant KA, Adkins DL, Donlan NA, Asay AL, Thomas N, Kleim JA, Jones TA, Hall S. 2011.  
1049 The Organization of the Forelimb Representation of the C57BL/6 Mouse Motor Cortex as  
1050 Defined by Intracortical Microstimulation and Cytoarchitecture. *Cereb Cortex* **21**:865–876.  
1051 doi:10.1093/cercor/bhq159
- 1052 Trapnell C, Roberts A, Goff L, Pertea G, Kim D, Kelley DR, Pimentel H, Salzberg SL, Rinn JL,  
1053 Pachter L. 2012. Differential gene and transcript expression analysis of RNA-seq  
1054 experiments with TopHat and Cufflinks. *Nat Protoc* **7**:562–578.  
1055 doi:10.1038/nprot.2012.016
- 1056 Tsukada S, Iino M, Takayasu Y, Shimamoto K, Ozawa S. 2005. Effects of a novel glutamate  
1057 transporter blocker, (2S, 3S)-3-{3-[4- (trifluoromethyl)benzoylamino]benzyloxy} aspartate  
1058 (TFB-TBOA), on activities of hippocampal neurons. *Neuropharmacology* **48**:479–491.  
1059 doi:10.1016/j.neuropharm.2004.11.006
- 1060 Tzingounis A V., Wadiche JI. 2007. Glutamate transporters: Confining runaway excitation by  
1061 shaping synaptic transmission. *Nat Rev Neurosci*. doi:10.1038/nrn2274
- 1062 Vaidyanathan T V., Collard M, Yokoyama S, Reitman ME, Poskanzer KE. 2021. Cortical  
1063 astrocytes independently regulate sleep depth and duration via separate gpcr pathways. *Elife*

- 1064        **10.** doi:10.7554/eLife.63329
- 1065    Ver Steeg G, Galstyan A. 2013. Information-theoretic measures of influence based on content  
1066        dynamics WSDM 2013 - Proceedings of the 6th ACM International Conference on Web  
1067        Search and Data Mining. pp. 3–12. doi:10.1145/2433396.2433400
- 1068    Vogelstein JT, Packer AM, Machado TA, Sippy T, Babadi B, Yuste R, Paninski L. 2010. Fast  
1069        nonnegative deconvolution for spike train inference from population calcium imaging. *J*  
1070        *Neurophysiol* **104**:3691–3704. doi:10.1152/jn.01073.2009
- 1071    Wang Y, DelRosso N V., Vaidyanathan T V., Cahill MK, Reitman ME, Pittolo S, Mi X, Yu G,  
1072        Poskanzer KE. 2019. Accurate quantification of astrocyte and neurotransmitter fluorescence  
1073        dynamics for single-cell and population-level physiology. *Nat Neurosci*.  
1074        doi:10.1038/s41593-019-0492-2
- 1075    Wei Z, Lin BJ, Chen TW, Daie K, Svoboda K, Druckmann S. 2020. A comparison of neuronal  
1076        population dynamics measured with calcium imaging and electrophysiology. *PLoS Comput*  
1077        *Biol* **16**:e1008198. doi:10.1371/journal.pcbi.1008198
- 1078    Wu D, Smyth GK. n.d. Camera: a competitive gene set test accounting for inter-gene correlation.  
1079        doi:10.1093/nar/gks461
- 1080    Yu X, Taylor AMW, Nagai J, Golshani P, Evans CJ, Coppola G, Khakh BS. 2018. Reducing  
1081        Astrocyte Calcium Signaling In Vivo Alters Striatal Microcircuits and Causes Repetitive  
1082        Behavior. *Neuron* **99**:1170-1187.e9. doi:10.1016/j.neuron.2018.08.015
- 1083
- 1084

1085 **FIGURES & FIGURE LEGENDS**

1086

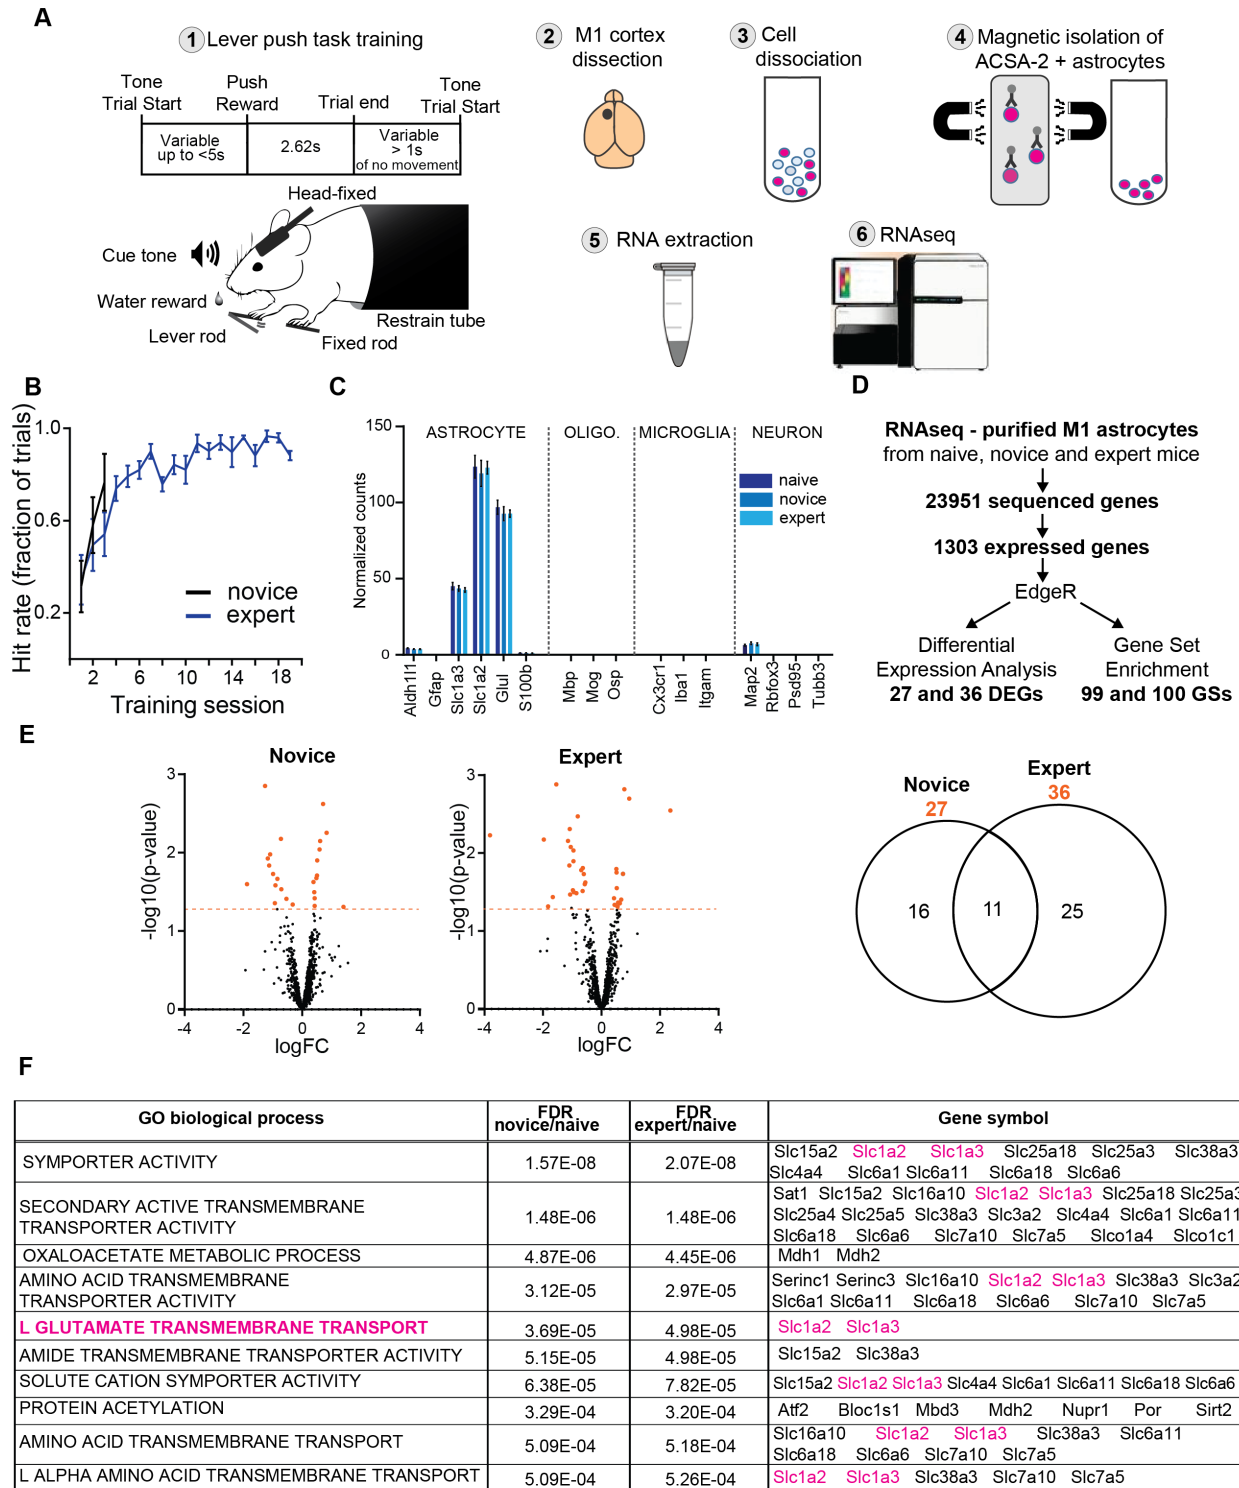

1087  
1088  
1089

**Figure 1: Motor Learning Leads to Modification of Gene Expression Profiles and Increased Coactivation of Microdomain Calcium Events in M1 Astrocytes. A. Methods summary. Lever**

1090 push task: a tone indicated trial start; lever push within 5 secs was rewarded with a drop of water  
1091 and response time and movement trajectory recorded. A window of 2.62 secs followed a push  
1092 (correct trial) to allow consummatory licking of the reward, or signaled timeout (missed trial), after  
1093 which a 1 sec inter-trial interval of no movement triggered start of the next trial. Motor cortex was  
1094 dissected and cell dissociated. Astrocytes were trapped in a magnetic column using magnetic beads  
1095 coated with anti-ACSA-2 antibodies and then collected for RNA extraction, cDNA library  
1096 preparation and sequencing. **B.** Learning curves of novice and expert mice trained in the lever push  
1097 task. Groups were named as follows: naive mice, not trained in the lever push task; novice mice,  
1098 trained for 3 training sessions; and expert mice, trained for 19 training sessions and showing  
1099 successful learning of the task. Graph represents hit rate (mean  $\pm$  SEM) as measured by the fraction  
1100 of correct trials. n=6 wildtype mice for each group. **C.** Astrocyte purification was confirmed for  
1101 the three groups by measures of the normalized gene expression of astrocyte, oligodendrocyte  
1102 (oligo.), microglia and neuron specific genes. Gene expression was normalized by housekeeping  
1103 gene counts (*Gapdh*). Bar plots represent mean  $\pm$ SEM. **D.** Gene expression profiles from  
1104 astrocytes of the three groups were analyzed and compared using the Bioconductor's EdgeR  
1105 package to perform Differentially Expressed Genes (DEGs) and Gene Set Enrichment Analyses.  
1106 27 DEGs were identified in novice mice, 36 DEGs in expert mice (see **Supplemental Figure 1**  
1107 and **Supplemental Table 1**). 99 gene sets in novice mice and 100 in expert mice were significantly  
1108 enriched relative to naive mice, with an overlap of 98 Gene Ontology (GO) categories (see  
1109 **Supplemental Table 3**). N=6 wildtype mice for each of the 3 groups. **E.** We identified 27  
1110 Differential Expression Genes (DEGs) in naïve mice, 36 DEGs in expert mice; 11 DEGs were  
1111 common for both. **Left:** Volcano plots of logarithms of fold change ( $\log_2FC$ ) and p-value ( $-\log_{10}$   
1112 (p-value)) of differential expression of all expressed genes. Each dot represents one gene. Orange  
1113 dots indicate DEGs (p-value>0.05) **Right:** Venn diagram of DEGs. **F.** Top 10 significantly  
1114 enriched Gene Sets differentially regulated in M1 astrocytes in novice and expert mice compared  
1115 to naive mice, and their respective expressed genes. In particular, the gene set corresponding to L-  
1116 glutamate transport function, in blue, was significantly enriched.  
1117



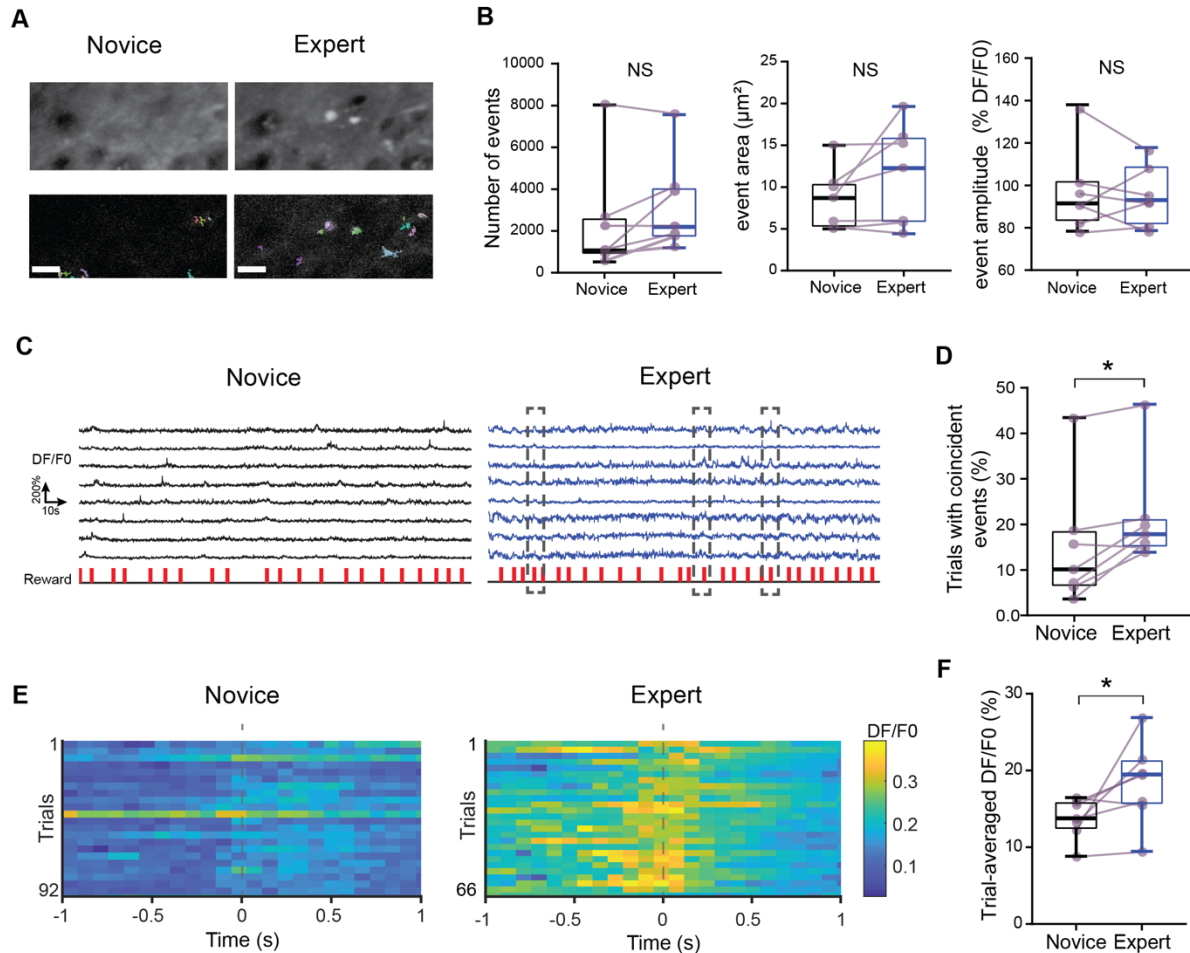

1118

1119 **Figure 2: Motor Learning Leads to Increased Coactivation of Calcium Events in M1**

1120 **Astrocyte.** GCaMP6f-lck signals in astrocyte were imaged in layer 2/3 of M1 as wild-type mice

1121 performed the lever push task. For each mouse, spatiotemporal calcium events were detected from

1122 3 non-overlapping field of views, during 3 novice and 3 expert sessions. N= 7 mice. **A-B.**

1123 Characterization of detected astrocyte calcium spatiotemporal events. **A.** Example frames from

1124 early in training (Novice) compared with an expert session of training (Expert) are shown, with

1125 astrocytic calcium events identified by the AQuA algorithm shown in the overlay (bottom panels).

1126 Scale bar represents 10 $\mu$ m. **B.** Quantification of number, area, and amplitude (DF/F0) of the

1127 detected astrocyte calcium events from novice and expert training sessions. Number of detected

1128 events: mean = 2331 $\pm$ 992.7 (median=1062) events for novice, 3199 $\pm$ 837.4 (median=2190) for

1129 expert mice, NS: p=0.1094, paired Wilcoxon test, n=7. Event area: mean = 8.602 $\pm$ 1.368  $\mu$ m<sup>2</sup>

1130 (median= 8.701  $\mu$ m<sup>2</sup>) for novice, 11.32 $\pm$ 2.258  $\mu$ m<sup>2</sup> (median=12.27  $\mu$ m<sup>2</sup>) for expert mice, NS:

1131 p=0.0781, paired Wilcoxon test, n=7. Amplitude: mean=0.9741 $\pm$ 0.074 DF/F0 (median=0.9151

1132 DF/F0) for novice, 0.9559 $\pm$ 0.053 DF/F0 (median=0.9304 DF/F0) for expert mice, NS: p=0.6875,

1133 paired Wilcoxon test, n=7. Box plot bar represents median, box extends from the 25th to 75th

1134 percentile, and whiskers show 10th to the 90th percentile. Purple circles represent the data points

1135 for each individual mouse. Paired values (same mouse) are indicated with purple lines. **C-F.**

1136 Learning of the task was associated with an increase in coincident activity of astrocyte calcium  
1137 events **C.** DF/F0 traces of example astrocytic calcium events. Red bars below DF/F0 traces  
1138 indicate reward time. Boxes in the expert traces indicate coincident events. **D.** Percentage of trials  
1139 where there was coincident activity (2 or more events occurring at the same time) during the lever  
1140 push, in novice training sessions compared to expert training sessions. Novice: mean=0.15±0.052  
1141 (median=10.12%), expert: mean=0.2146±0.043 (median=17.87%) \*: p=0.0313, paired Wilcoxon  
1142 test, n=7. **E.** Trial-averaged astrocyte calcium activity (DF/F0) in example novice and expert  
1143 sessions from the same M1 layer 2/3 astrocytes. Calcium activity in astrocytes was measured  
1144 during the task and events were identified, aligned to the threshold crossing in the movement  
1145 trajectory, and averaged. Zero (0) on the time axis and the vertical dashed line indicate time when  
1146 lever position reached the reward threshold (1mm). **F.** Quantification of astrocyte calcium activity  
1147 during correct trials (trial-averaged DF/F0) in novice and expert mice. Novice: mean=0.1375±0.01  
1148 (median=0.1378 DF/F0), expert: mean=0.1837±0.02 (median=0.195 DF/F0). \*: p=0.469, paired  
1149 Wilcoxon test.

1150

1151

1152

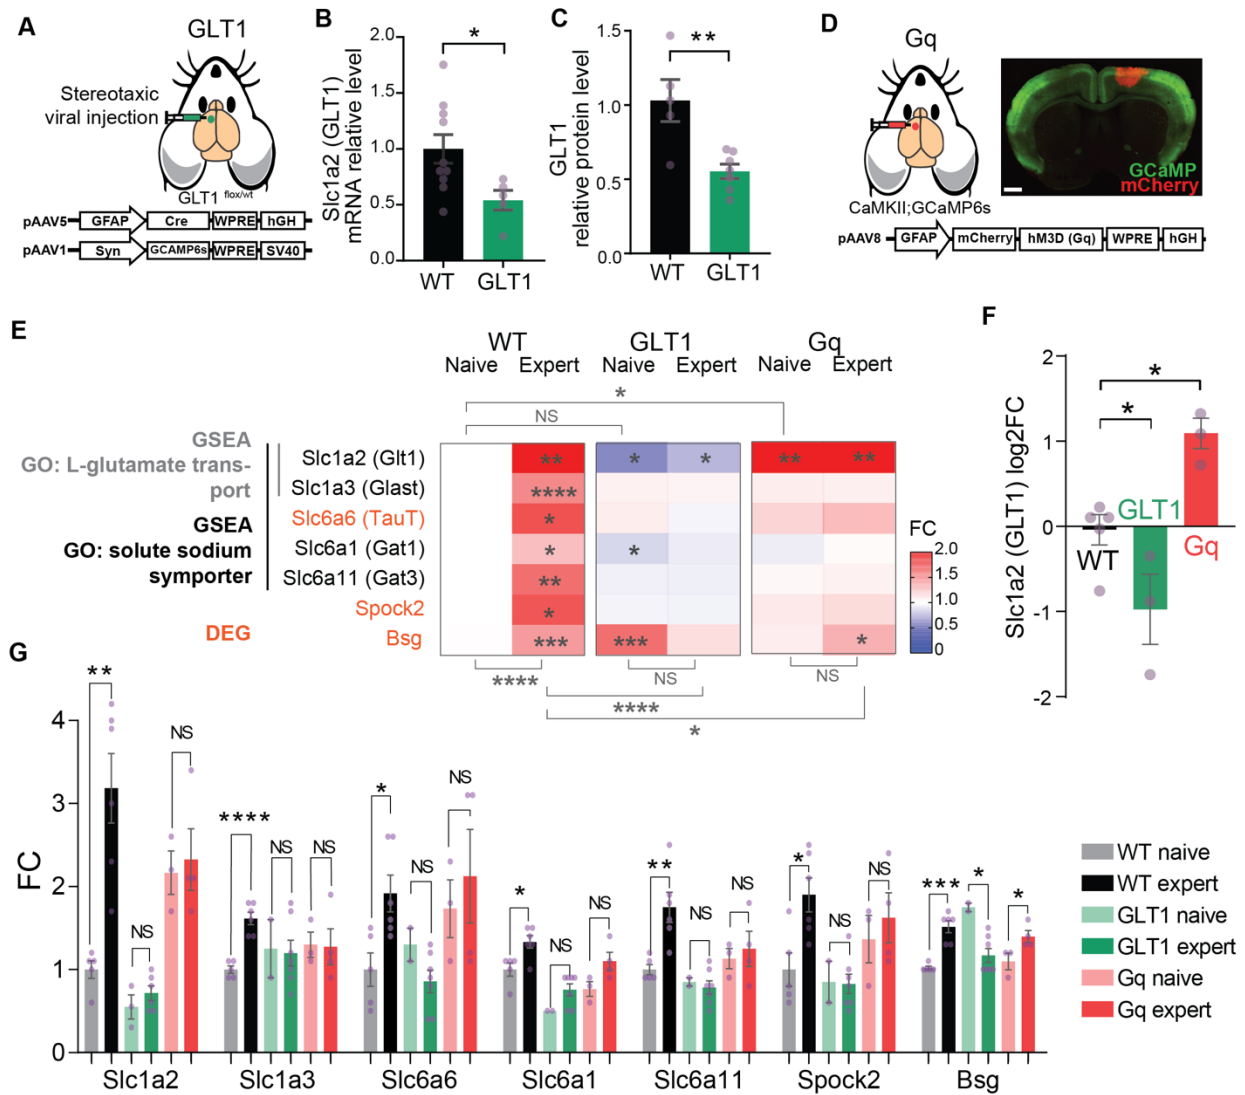

1153

1154 **Figure 3: Decreased GLT1 Levels and Astrocyte Gq Pathway Activation in M1 Impair**  
 1155 **Motor Learning-Associated Changes in Gene Expression** **A.** AAV-GFAP-CRE, or  
 1156 alternatively AAV-GFAP-CRE and AAV-Syn-GCaMP6s (for neuronal imaging experiments),  
 1157 were injected in M1 of GLT1 flox/+ mice (“GLT1”) and their wild type littermates (“WT”). **B.**  
 1158 GLT1 mice show a 46% reduction of Slc1a2 (Glt1) mRNA levels compared to WT (n= 10 WT  
 1159 mice, 6 GLT1 mice, ratio=0.5401±0.0882, \*: p=0.0337, unpaired t-test), as measured by RTqPCR.  
 1160 Bar plots in B, C represent mean ± SEM, purple dots represent single observations. **C.** GLT1 mice  
 1161 show a 45% reduction of GLT1 protein level (n=6 WT, 8 GLT1 mice, ratio=0.5535±0.0485, \*\*:  
 1162 p=0.0045, unpaired t-test), as measured by Western Blot. See also **Supplemental Figure 2.** **D.**  
 1163 **Left:** AAV-GFAP-h3MD(Gq)-mCherry was injected in the M1 cortex of CaMKII-GCaMP6s or  
 1164 WT mice. **Right:** Example CaMKII-GCaMP6s mouse brain coronal section. AAV-GFAP-  
 1165 h3MD(Gq)-mCherry expression was localized in upper layer astrocytes of M1. Scale bar, 1mm.  
 1166 **E.** Heatmap of average gene expression fold change (FC) of selected genes, measured by RTqPCR

1167 and normalized to wildtype naïve mice. Genes were selected within RNAseq identified DEGs  
1168 (*Bsg*, *Spock2* and *Slc6a6*, highlighted in orange) and GSEA gene sets (*Slc1a2*, *Slc1a3* from GO:  
1169 L-glutamate transmembrane transport, and *Slc1a2*, *Slc1a3*, *Slc6a6*, *Slc6a1*, *Slc6a11* from GO:  
1170 solute sodium symporter activity) (see also **Figure 1**). In contrast to WT mice, GLT1 and Gq mice  
1171 did not show motor learning-associated changes in gene expression. Naïve vs Expert, two-way  
1172 ANOVA, WT: \*\*\*\*:  $p < 0.0001$ , GLT1: NS:  $p = 0.2338$ , Gq: NS:  $p = 0.1603$  for the variability  
1173 explained by learning. Stars on the heatmap indicate statistically significant differences for each  
1174 individual gene in comparison to WT naïve (one-way ANOVA with Dunnett's multiple  
1175 comparisons test), stars below and above the heatmap indicate statistical significance of the  
1176 variability explained by the manipulation considering all genes (two-way ANOVA), stars over the  
1177 bar plot indicate statistical significance for the mean comparison of naïve and expert expression  
1178 levels for each individual gene. NS:  $p > 0.05$ , \*:  $p < 0.05$ , \*\*:  $p < 0.01$ , \*\*\*:  $p < 0.001$ , \*\*\*\*:  $p < 0.0001$ .  
1179 **F.** *Slc1a2* was significantly downregulated in GLT1 naïve mice and upregulated in Gq naïve mice  
1180 compared to WT naïve mice. Logarithm of fold change ( $\log_2FC$ ). Naïve WT mice:  
1181  $\text{mean} = 0 \pm 0.1792$ ,  $n = 5$ ; naïve GLT1 mice,  $\text{mean} = -0.9738 \pm 0.4123$ ,  $n = 3$ , Gq naïve:  
1182  $\text{mean} = 1.09 \pm 0.1783$ ,  $n = 3$ . WT vs. GLT1 \*:  $p = 0.0197$ , WT vs. Gq \*:  $p = 0.071$ , Dunnett's multiple  
1183 comparisons test, One-way ANOVA). **G.** Bar plot ( $\text{mean} \pm \text{SEM}$ ) representing the expression fold  
1184 change (FC) of selected genes in the forelimb motor cortex of WT, GLT1 and Gq mice, naïve and  
1185 expert mice. RTqPCR confirmed significantly increased expression levels of all selected genes in  
1186 expert WT mice compared to naïve WT mice ( $n = 5$  naïve WT mice,  $n = 6$  expert WT mice).  
1187 Compared to WT naïve mice, *Slc1a2* was significantly downregulated in GLT1 naïve and expert  
1188 mice (WT naïve,  $\text{mean} = 1 \pm 0.1049$ ,  $n = 5$ ; GLT1 naïve,  $\text{mean} = 0.55 \pm 0.1443$ ,  $n = 3$ , \*:  $p = 0.0424$ ,  
1189 unpaired t-test; GLT1 expert,  $\text{mean} = 0.7167 \pm 0.08724$ ,  $n = 5$ ; \*:  $p = 0.0476$ , Mann Whitney U test),  
1190 and upregulated in Gq naïve and expert mice (Gq naïve :  $\text{mean} = 2.167 \pm 0.2603$ ,  $n = 3$ , \*\*:  $p = 0.0026$ ,  
1191 unpaired t-test; Gq expert :  $\text{mean} = 2.325 \pm 0.3705$ ,  $n = 4$ , \*\*:  $p = 0.0465$ , unpaired t-test). *Bsg* was the  
1192 only gene that showed changes between naïve and expert mice in GLT1 and Gq mice, with a  
1193 downregulation associated with the learning in GLT1 mouse and an upregulation in Gq mice  
1194 (GLT1: naïve,  $\text{mean} = 1.75 \pm 0.05$ ,  $n = 3$ , expert,  $\text{mean} = 1.171 \pm 0.08371$ ,  $n = 7$ , \*:  $p = 0.0101$ , unpaired  
1195 t-test; Gq: naïve,  $\text{mean} = 1.1 \pm 0.1$ ,  $n = 3$ , expert,  $\text{mean} = 1.40 \pm 0.07071$ ,  $n = 4$ , \*:  $p = 0.0286$ , Mann  
1196 Whitney U test). Of note, *Bsg* was significantly upregulated in naïve GLT1 mice and in expert Gq  
1197 mice compared to WT naïve mice (GLT1 naïve:  $\text{mean} = 1.75 \pm 0.05$ ,  $n = 3$ , \*\*\*\*:  $p < 0.0001$ , unpaired  
1198 t-test; Gq expert:  $\text{mean} = 1.40 \pm 0.07071$ ,  $n = 4$ , \*\*\*:  $p = 0.0007$ , unpaired t-test).  
1199

1200

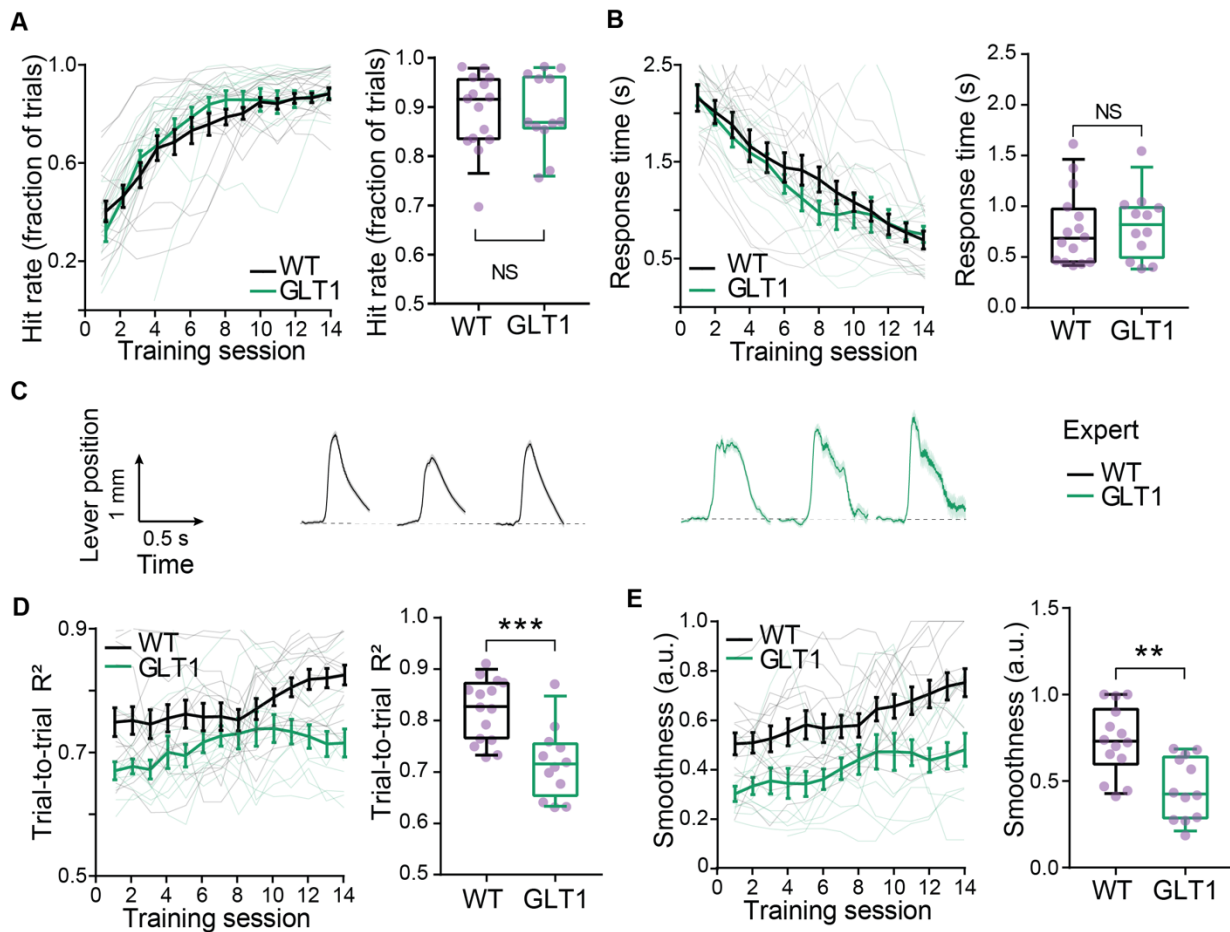

1201

1202

1203

1204

1205

1206

1207

1208

1209

1210

1211

1212

1213

1214

1215

1216

1217

**Figure 4: Decreased GLT1 Levels in M1 Astrocytes Alter Movement Trajectories.** **A.** GLT1 reduction in M1 astrocytes had no effect on hit rate. **Left:** all training sessions **Right:** average of expert sessions (training days 12-14) (WT: mean=0.8892±0.01968, GLT1: mean=0.8847±0.01774, NS: p=0.984, unpaired t-test). For all panels, N= 15 WT, 12 GLT1 mice; box plots as described in Fig. 2B. **B.** GLT1 reduction had no effect on response time. **Left:** all training sessions **Right:** average of expert sessions (WT: mean=0.7739±0.0682s, GLT1: mean=0.7905±0.06986, NS: p=0.8384, unpaired t-test). **C-E.** Reduced GLT1 in M1 astrocytes perturbed learning of stereotyped and smooth movement trajectories **C.** Example average lever trajectory traces of three expert training sessions for one WT (black) and one GLT1 (green) example mouse. **D.** Trial-to-trial movement similarity estimated by the average pairwise correlation of the movement traces (trial-to-trial R<sup>2</sup>). **Left:** all training sessions. **Right:** expert sessions average (WT: mean WT=0.8204±0.01064, GLT1: mean=0.7137±0.0139; \*\*\*: p=0.0004, unpaired t-test). **E.** Average movement smoothness estimated by the inverse of the number of push events per movement. **Left:** all training sessions. **Right:** expert sessions average (WT: mean=0.7325±0.03158, GLT1: mean=0.4585±0.03156; \*\*: p=0.0012, unpaired t-test).

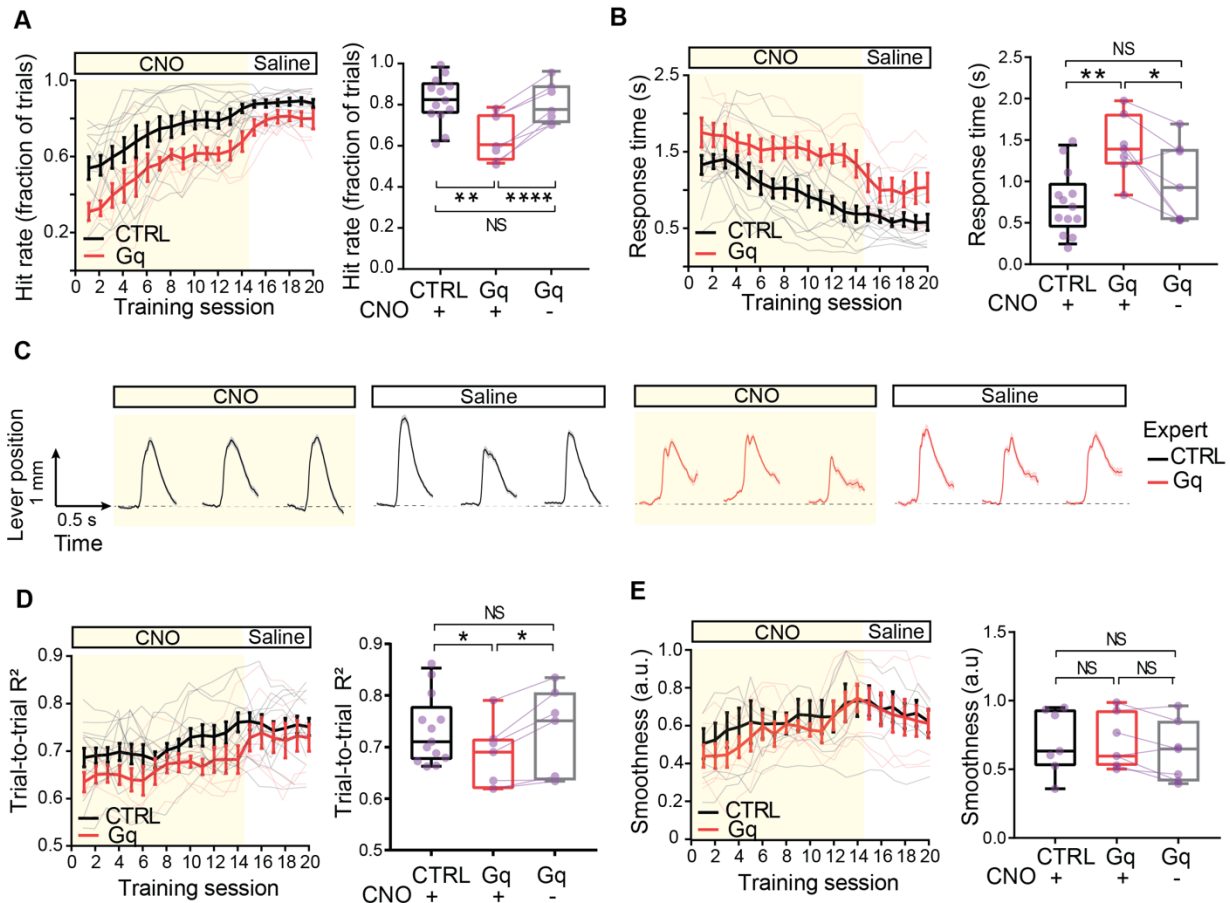

1218

1219 **Figure 5: Astrocyte Gq Pathway Activation in M1 Impairs Task Performance**

1220 Mice expressing GFAP-h3MD(Gq)-mCherry (“Gq”) and controls (“CTRL”) were injected

1221 intraperitoneally 30 min before a training session started with low dose of clozapine-N-oxide

1222 (“CNO”) for the first 14 training days, then with saline solution (“saline”) for 6 additional training

1223 days. For all panels, N=13 CTRL, 7 Gq mice; box plots as described in Fig. 2B. **A.** Gq activation

1224 in M1 astrocytes reduced hit rate. **Left:** all training sessions **Right:** average of expert sessions

1225 (data from training days 12-14 and 18-20) (CTRL+CNO: mean=0.8127±0.02985, Gq+CNO:

1226 mean=0.6445±0.03813, Gq+saline: mean=0.8205±0.03272, CTRL+CNO vs. Gq+CNO \*\*: p=0.0062,

1227 CTRL+CNO vs. Gq+saline NS: p=0.9660, Tukey’s multiple comparison, One-way

1228 ANOVA; Gq+CNO vs. Gq+saline \*\*\*\*: p<0.0001, paired t-test). **B.** Gq activation increased

1229 response time. **Left:** all training sessions **Right:** average of expert sessions (CTRL+CNO:

1230 mean=0.7104±0.07735, Gq+CNO: mean=1.458±0.1039, Gq+saline: mean=1.02±0.1249,

1231 CTRL+CNO vs. Gq+CNO \*\*: p=0.0048, CTRL+CNO vs. Gq+saline NS: p=0.3961, Tukey’s

1232 multiple comparison, One-way ANOVA; Gq+CNO vs. Gq+saline \*: p=0.0225, paired t-test). **C-**

1233 **E.** Gq activation in M1 astrocytes perturbed movement trajectories. **C.** Example average

1234 movement trace of three expert training sessions with CNO or saline injection, for one CTRL

1235 (black) and one Gq (red) example mouse. **D.** Trial-to-trial movement similarity. **Left:** all training

1236 sessions **Right:** average of expert sessions (CTRL+CNO: mean=0.73±0.01295, Gq+CNO:

1237 mean=0.681±0.01631, Gq+saline: mean=0.7467±0.01579, CTRL+CNO vs. Gq+CNO \*:  
1238 p=0.0493, CTRL+CNO vs. Gq+saline NS: p=0.9668, Tukey's multiple comparison, One-way  
1239 ANOVA; Gq+CNO vs. Gq+saline \*: p=0.0111, paired t-test). **H** Average movement smoothness  
1240 **Left:** all training sessions. **Right:** average of expert sessions (CTRL+CNO:  
1241 mean=0.6999±0.04929, Gq+CNO: mean=0.7005±0.04288, Gq+saline: mean=0.6999±0.04929,  
1242 CTRL+CNO vs. Gq+CNO NS: p>0.999, CTRL+CNO vs. Gq+saline NS: p=0.8073, Tukey's  
1243 multiple comparison, One-way ANOVA; Gq+CNO vs. Gq+saline NS: p=0.0855, paired t-test).  
1244

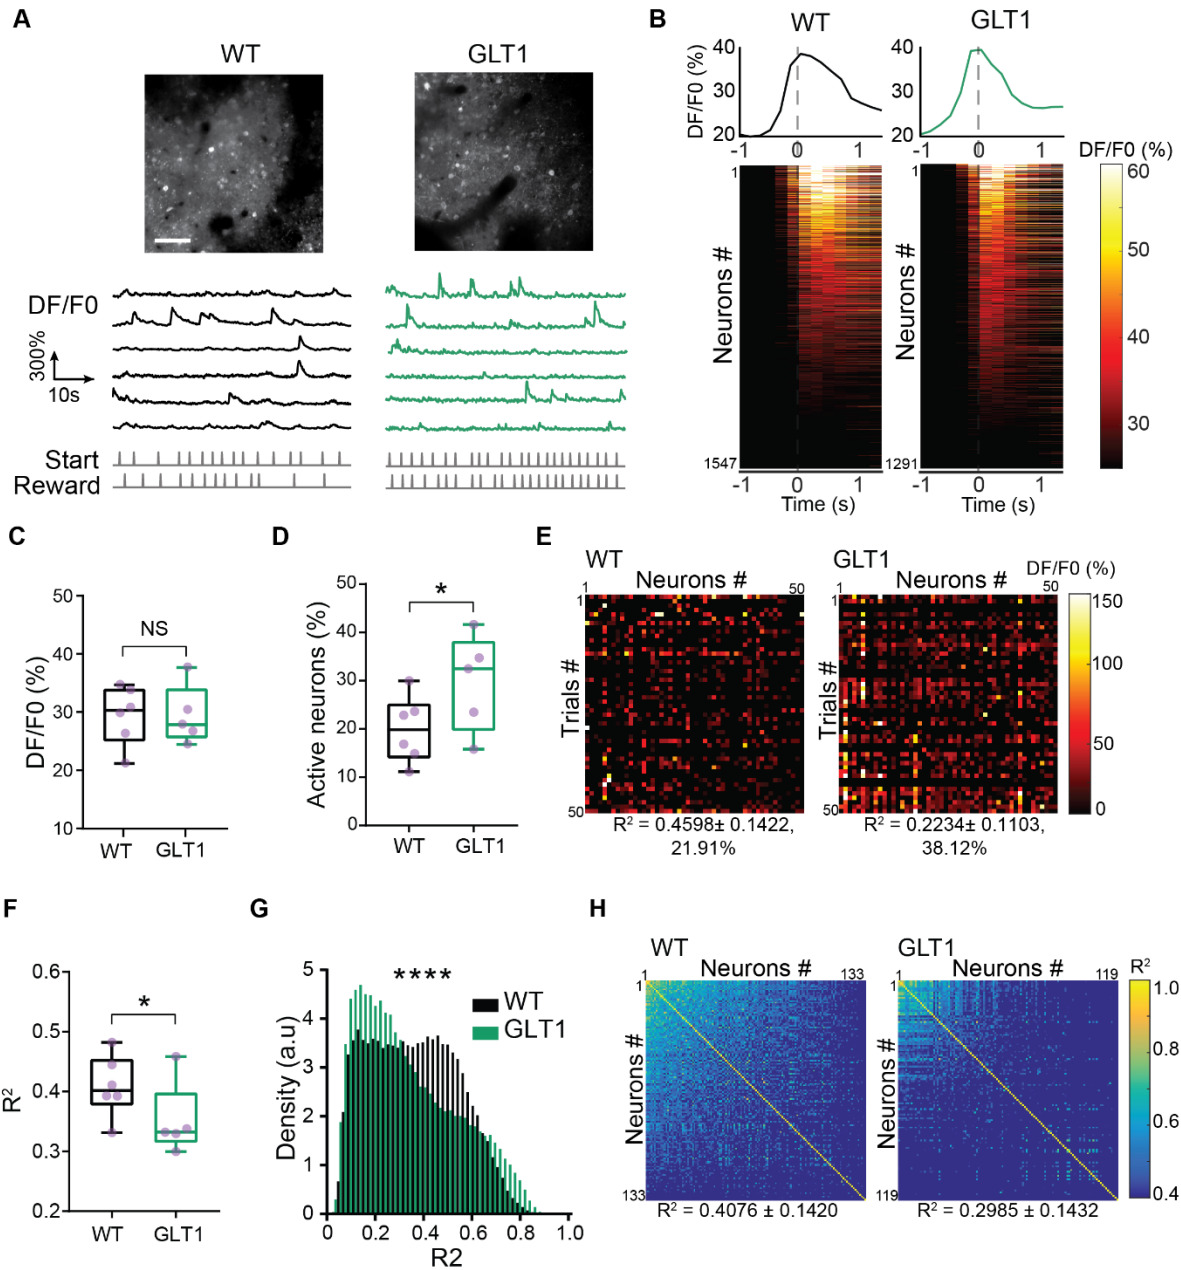

1245

1246 **Figure 6: Decreased GLT1 Levels in M1 Astrocytes Reduce Neuronal Signal Correlations.**

1247 **A-C.** Decreased GLT1 did not significantly change average neuronal activity. **A. Top:** Example  
 1248 field-of-view of neuronal GCaMP6s two-photon imaging *in vivo*. Scale bar, 25 $\mu$ m. **Bottom:**  
 1249 Example raw DF/F0 traces. **B.** Aligned trial-averaged responses of M1 layer 2/3 neurons. WT:  
 1250 n=1547 neurons from 15 non-overlapping fields of view from 6 mice, GLT1: n=1291 neurons  
 1251 from 13 non-overlapping fields of view from 5 mice, from expert session training days 10-14.  
 1252 **Top:** average DF/F0 trace over movement epoch. **Bottom:** normalized DF/F0 colormap; neurons  
 1253 are sorted by maximum activity. Zero (0) on x axis, and vertical dashed line indicate time when  
 1254 lever position reached the reward threshold (1mm). **C.** Average trial activity (DF/F0) (WT: mean=



1255  $29.41 \pm 2.053$ , GLT1: mean=  $29.41 \pm 2.281$ , NS:  $p=0.9987$ , unpaired t-test). **D.** Decreased  
1256 astrocyte GLT1 increased the proportion of active neurons during the movement period. Neurons  
1257 were defined as active during the movement period if the activity during movement (1s period)  
1258 was two standard deviations above the activity during ITI (1s period). Percentage of movement  
1259 related neurons was calculated for each trial and then averaged across all trials. Percentage of  
1260 active neurons during lever push was higher in GLT1 mice than WT (WT: mean=  $19.89 \pm 1.89$ ,  
1261 GLT1: mean=  $29.62 \pm 3.01$ , \*:  $p=0.0103$ , unpaired t-test). **E.** Example colormaps of trial average  
1262 activity for the first 50 trials for 50 neurons recorded in one expert training session. Neuron-to-  
1263 neuron average pairwise correlation  $R^2$  values and percentage of active neurons are indicated  
1264 below each matrix. **F-H.** Decreased astrocyte GLT1 reduced neuronal signal correlations. **F.** Trial-  
1265 to-trial activity similarity was measured by the average pairwise correlation of single neuron  
1266 activity vectors of concatenated trials. GLT1 mice had significantly lower average pairwise signal  
1267 correlation (WT: mean=  $0.4091 \pm 0.01415$ , GLT1: mean=  $0.3516 \pm 0.01835$ , \*:  $p=0.0204$ ,  
1268 unpaired t-test). **G.** Density histograms of pairwise neuronal correlation distribution (\*\*\*\*:  
1269  $p<0.001$ , Kolmogorov-Smirnov test). **H.** Example sorted correlation matrices of neuron-to-neuron  
1270 average pairwise correlations for all neurons of one example session/ field of view. Neuron-to-  
1271 neuron average pairwise correlation  $R^2$  values of the examples are indicated. For all panels, N=6  
1272 WT, 5 GLT1 mice; box plots as described in Fig. 2B.  
1273

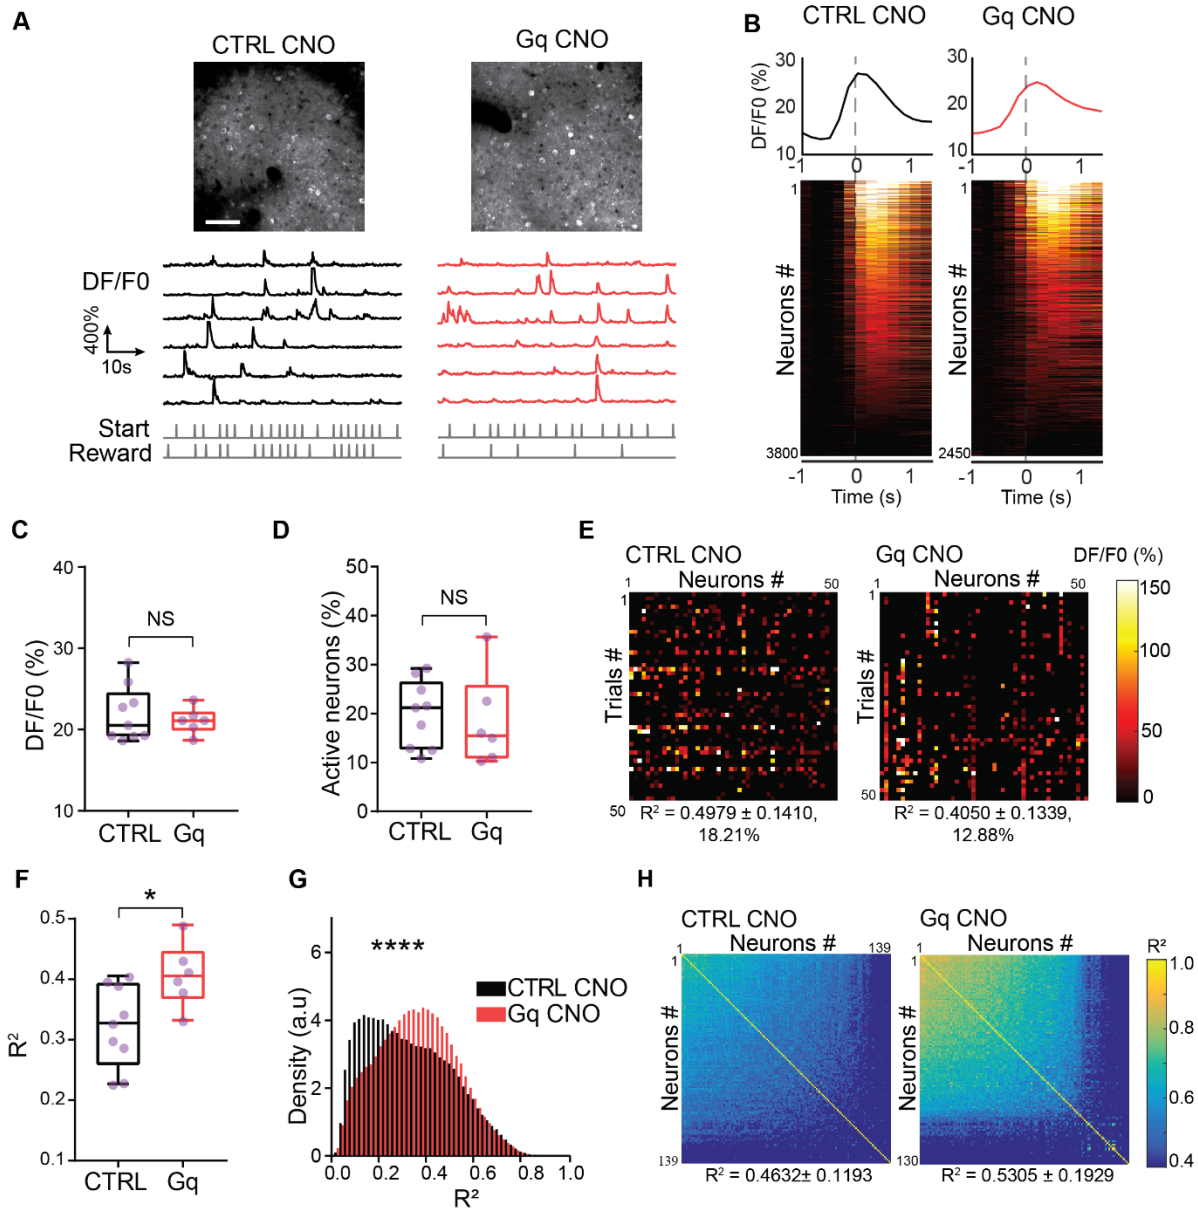

1274

1275

1276 **Figure 7: Gq Pathway Activation in M1 Astrocytes Increases Neuronal Signal Correlations.**

1277

1278 **A-C.** Astrocyte Gq activation did not significantly change average neuronal activity. **A. Top:**

1279 Example field-of-view of neuronal GCaMP6s two-photon imaging *in vivo*. Scale bar, 25 $\mu$ m.

1280 **Bottom:** Example raw DF/F0 traces. **B.** Aligned trial-averaged responses of M1 layer 2/3 neurons.

1281 N=3800 neurons from 9 CTRL mice injected with CNO, n=2450 neurons from 6 Gq mice injected

1282 with CNO; data from expert sessions. **Top:** average DF/F0 trace over movement epoch. Zero (0)

1283 on x axis, and vertical dashed line indicate time when lever position reached the reward threshold

1284 (1mm). **Bottom:** normalized DF/F0 colomap; neurons are sorted by maximum activity. **C.**

1285 Average trial activity (DF/F0) (CTRL+CNO: mean= 21.87  $\pm$  1.136, Gq+CNO: mean= 21.08  $\pm$

1286 0.6631, NS: p=0.6077, unpaired t-test). **D.** Neurons were defined as active during the movement

1287 period if the activity during movement (1s period) was two standard deviations above the activity

1287 and then averaged across all trials. Percentage of active neurons during lever push movement was  
1288 not significantly different between CTRL and Gq mice (CTRL+CNO: mean=  $19.88 \pm 2.286$ ,  
1289 Gq+CNO: mean=  $18.41 \pm 3.883$ , NS:  $p=0.7336$ , unpaired t-test). **E.** Example colormaps of trial  
1290 average activity for the first 50 trials for 50 neurons recorded in one expert training session.  
1291 Neuron-to-neuron average pairwise correlation  $R^2$  values and percentage of active neurons of the  
1292 examples are indicated below each matrix. **F-H.** Astrocyte Gq activation increased neuronal signal  
1293 correlations **F.** Trial-to-trial activity similarity was measured by the average pairwise correlation  
1294 of single neuron activity vectors of concatenated trials. (CTRL+CNO: mean=  $0.323 \pm 0.02267$ ,  
1295 Gq+CNO: mean=  $0.4074 \pm 0.02154$ , \*:  $p=0.0237$ , unpaired t-test). **G.** Density histograms of  
1296 pairwise neuronal correlation distribution (\*\*\*\*:  $p<0.0001$ ; Kolmogorov-Smirnov test). **H.**  
1297 Example sorted correlation matrices of neuron-to-neuron average pairwise correlations for all  
1298 neurons of one example session/ field of view. Neuron-to-neuron average pairwise correlation  $R^2$   
1299 values of the examples are indicated. For all panels,  $n=9$  CTRL+CNO, 6 Gq+CNO mice, injected  
1300 intraperitoneally 30 min before all training session with low dose of CNO. Box plots as described  
1301 in Fig. 2B.

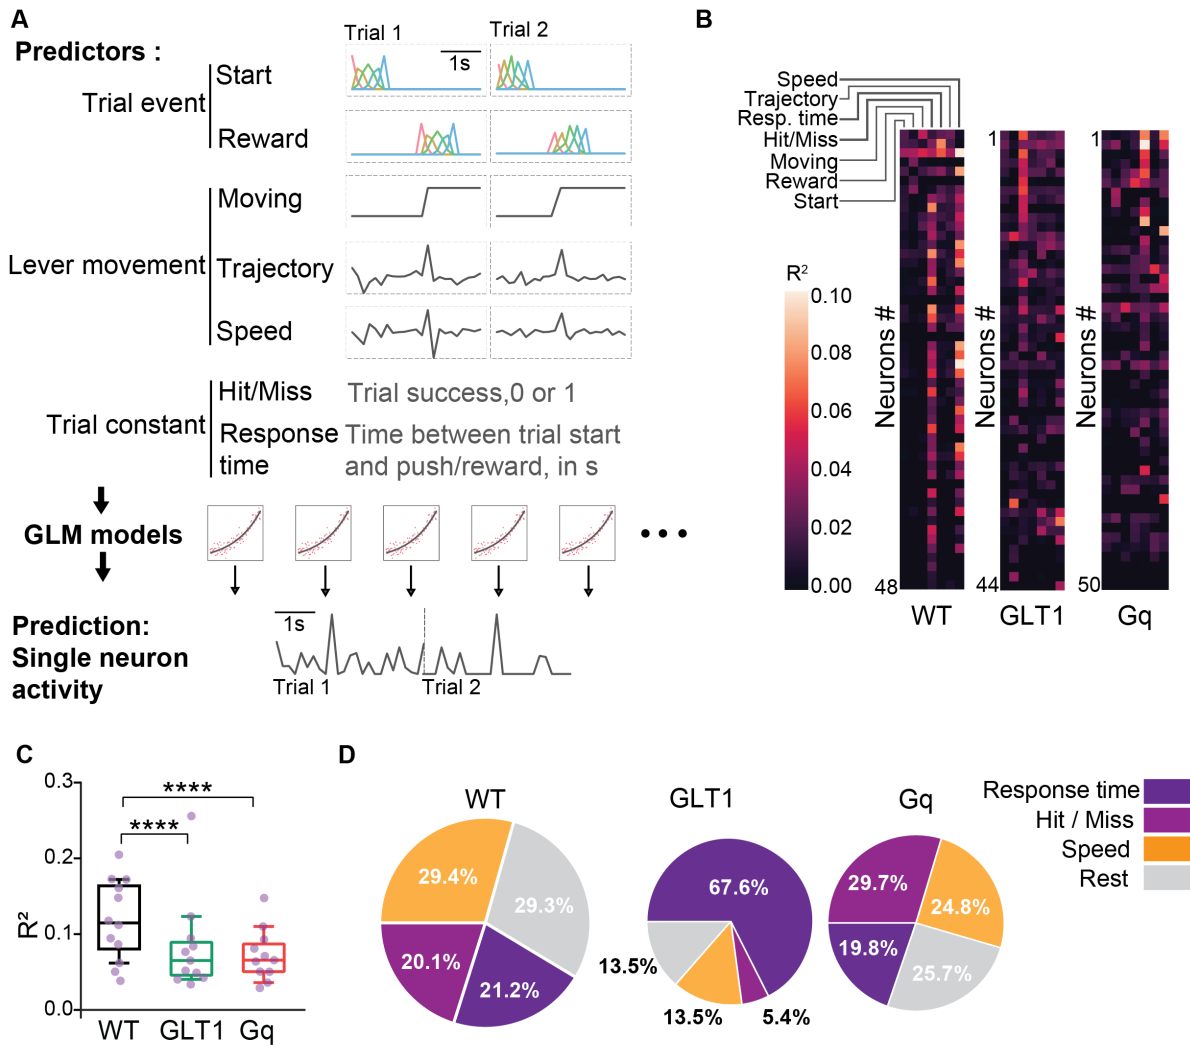

1302

1303 **Figure 8: Astrocyte Manipulations Modulate M1 Neuronal Encoding of Task Parameters A.**

1304 The Generalized Linear Model (GLM) used to model neuronal encoding of task parameters.

1305 Predictors and predicted neuronal activity in an example trial. Seven predictors spanning trial

1306 event, lever movement, and trial constant were used. See Methods for details. One GLM model

1307 was fit for each neuron and the  $R^2$  between predicted and actual neuronal activity was calculated

1308 for either a full model using all the above behavioral measures as predictors, or a model with all

1309 but one behavioral feature. The difference between predictions from these two models was used

1310 to measure the contribution from the particular behavioral feature. N= 580/586/565 neurons, from

1311 13/11/16 non-overlapping fields of view, from 5/3/5 WT/GLT1/Gq mice respectively. **B.**

1312 Representative single neurons' encoding  $R^2$  values from the seven predictors for WT, GLT1 and

1313 Gq mice. Rows represent individual neurons; columns represent the contribution of individual

1314 features. **C.** Single neuron predictive power  $R^2$  values from all features. Both astrocyte

1315 manipulations reduced the predictive power of the full model (N=13/11/16 for WT/GLT1/Gq

1316 respectively, WT: median=0.104, GLT1: median=0.066,  $p = 2.15E-18$ , Mann-Whitney U test;

1317 WT: median=0.104, Gq: median=0.072,  $p = 3.14E-11$ , Mann-Whitney U test). Box plots as  
1318 defined in Fig. 2B. **D.** Pie chart comparison of mean  $R^2$  across all neurons, for the most predictive  
1319 task features (see **Supplemental Figure 7**). The size of each pie represents the mean neuronal  
1320 encoding power for WT, GLT1 and Gq mice (from C). GLT1 mice showed a change in the  
1321 predictors' contribution profile compared to WT mice, with a larger relative encoding contribution  
1322 of response time and relative decrease in encoding of all other features. Gq mice showed a small  
1323 relative increase in neuronal encoding of trial outcome (Hit/Miss) compared to WT mice, and in  
1324 general a reduced but globally conserved predictor contribution profile, suggesting a global  
1325 reduction of encoding of all task parameters.  
1326

1327 **SUPPLEMENTAL INFORMATION**

1328 **Supplemental Figures 1-8:**

1329

1330

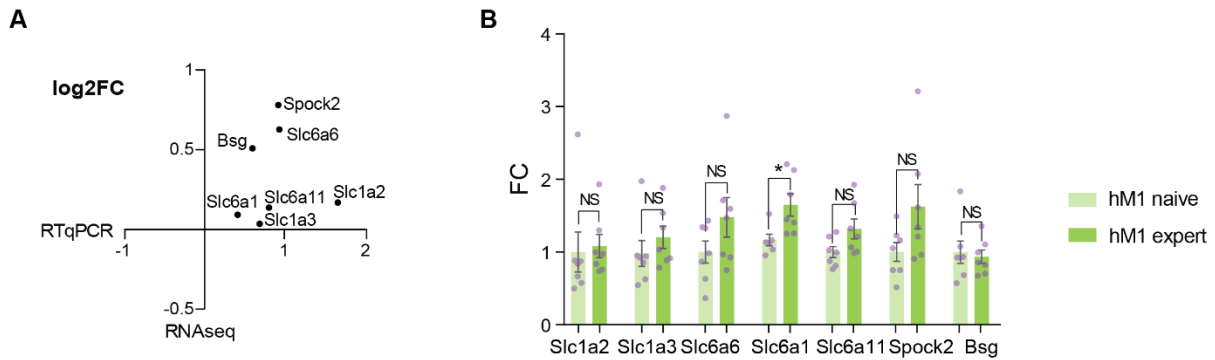

1331

1332

### Supplemental Figure 1: Motor Learning Leads to Modification of Gene Expression Profiles

1333

1334

1335

1336

1337

1338

1339

1340

1341

1342

1343

1344

1345

**A.** XY plot of logarithm of fold change ( $\log_2FC$ ) in WT expert mice relative to naïve mice, as measured in RNAseq experiment (y axis) compared to RTqPCR experiments (x axis), using independent samples. The two independent experiments showed the same trend of gene expression changes in expert mice compared to naïve mice.  $N=3-6$  mice per group for RTqPCR, 6 mice per group for RNAseq. **B.** Bar plot (mean  $\pm$  SEM) representing the expression fold change (FC) of selected genes in the hindlimb motor cortex (hM1) of WT naïve and expert mice ( $n=7$  mice per group). Slc1a2 (naïve  $1 \pm 0.2766$ , expert  $1.082 \pm 0.1600$ , NS:  $p=0.8018$ , unpaired t-test), Slc1a3 (naïve  $1 \pm 0.1777$ , expert  $1.201 \pm 0.1527$ , NS:  $p=0.3632$ , unpaired t-test), Slc6a6 (naïve  $1 \pm 0.1516$ , expert  $1.478 \pm 0.2721$ , NS:  $p=0.1511$ , unpaired t-test), Slc6a1 (naïve  $1 \pm 0.0802$ , expert  $1.648 \pm 0.1521$ , \*:  $p=0.0217$ , unpaired t-test), Slc6a11 (naïve  $1 \pm 0.07358$ , expert  $1.319 \pm 0.1362$ , NS:  $p=0.0620$ , unpaired t-test), Spock2 (naïve  $1 \pm 0.1275$ , expert  $1.624 \pm 0.3058$ , NS:  $p=0.084$ , unpaired t-test), Bsg (naïve  $1 \pm 0.1541$ , expert  $0.9357 \pm 0.091$ , NS:  $p=0.7316$ , unpaired t-test).

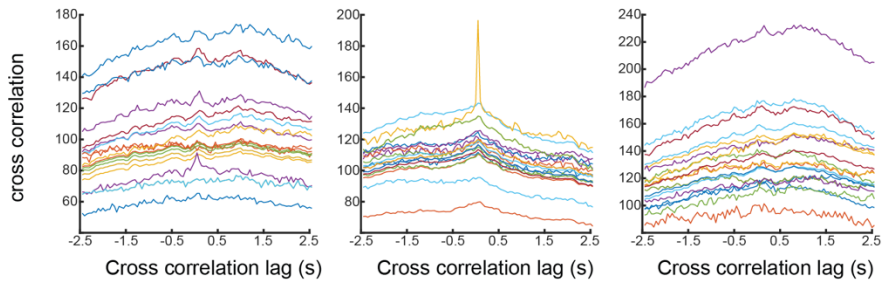

1346  
1347 **Supplemental Figure 2:** Raw cross correlation values between the full DF/F0 trace of three  
1348 example events with the full DF/F0 traces of 20 random events from the same video. The lack of  
1349 a clear peak in the majority of cross correlations shows that the majority of events are not correlated  
1350 in time.  
1351



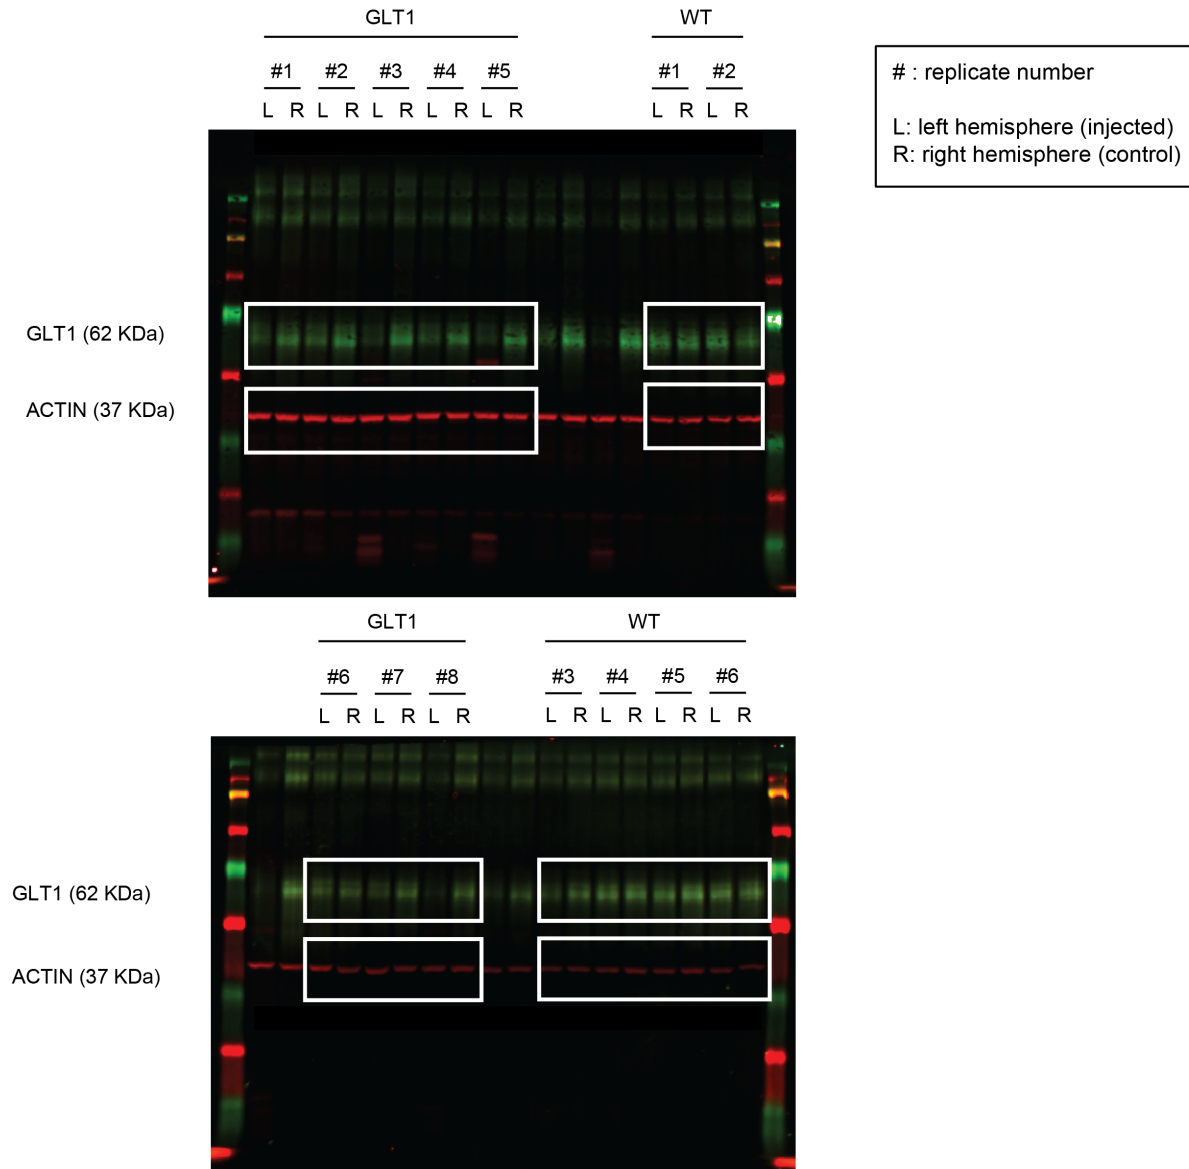

1352

1353 **Supplemental Figure 3: Annotated raw images of Western Blot.** White boxes indicate samples  
1354 used for quantification of GLT1 protein levels described in Figure 3. Each replicate is a single  
1355 mouse, M1 cortex from left (L) and right (R) hemispheres were dissected and protein levels  
1356 measured by Western Blot.

1357

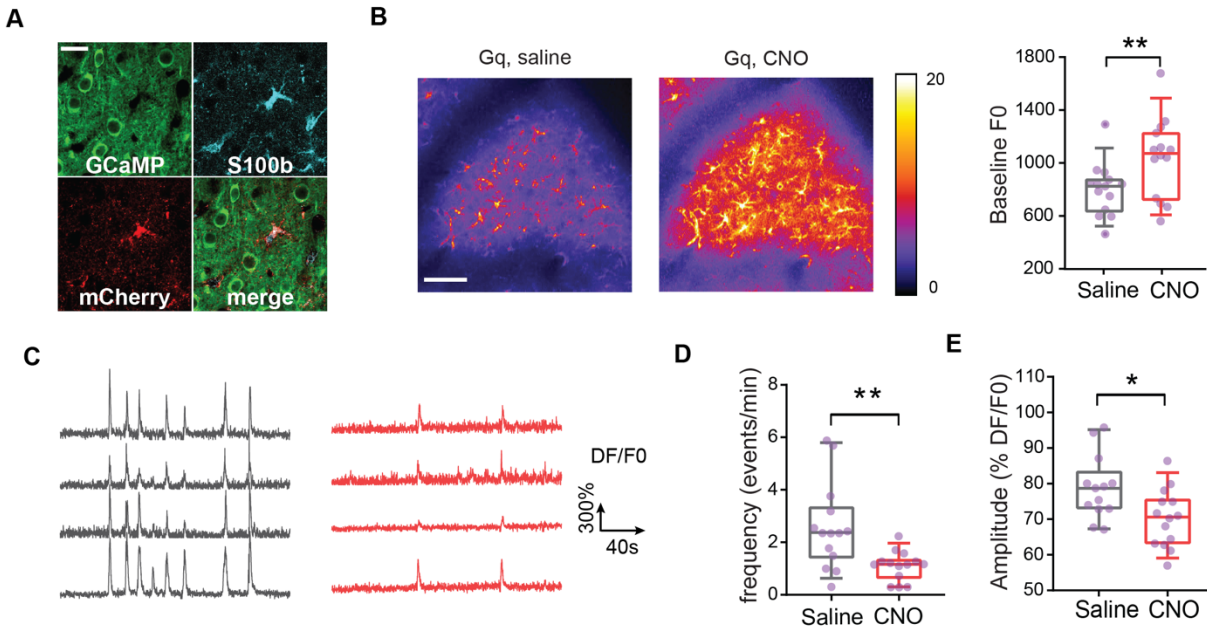

1358  
1359  
1360  
1361  
1362  
1363  
1364  
1365  
1366  
1367  
1368  
1369  
1370  
1371  
1372  
1373  
1374  
1375  
1376  
1377

**Supplemental Figure 4: Calcium Activity in Gq Activated Astrocytes.** **A.** h3MD(Gq)-mCherry colocalized with immunohistochemistry labeling of astrocyte marker S100b but not with neuronal GCaMP. Scale bar, 25 $\mu$ m. **B.** Gq activation increased the levels of cytoplasmic calcium. The same field-of-views containing AAV-GFAP-h3MD(Gq)-mCherry expressing astrocytes (“Gq”) in naïve (untrained) GFAP-GCaMP5G mice were imaged over 10 min passive sessions, 24 hours apart, and 30 min after IP injection of vehicle (saline) or clozapine-N-oxide (CNO). **Left:** Colormaps of the projection of the average GCaMP fluorescence (color bar) in astrocytes, in a 10 min imaging session. Example astrocytes GCaMP fluorescence imaging sessions (24 hours apart) of the same field of view, 30 min after IP injection of either clozapine-N-oxide (CNO) or vehicle (saline). Scale bar represents 100  $\mu$ m. **Right:** Quantification of calcium baseline levels (average GCaMP fluorescence) from the three imaging sessions. (n= 14 non-overlapping fields of view from 5 mice, Gq+saline: mean = 802.8 $\pm$ 53.07, Gq+CNO: mean= 1043 $\pm$ 80.06, \*\*: p=0.0093, paired t-test). **C.** Example astrocyte ROI raw DF/F0 traces (black, Gq+saline; red, Gq+CNO). **D.** Frequency of spontaneous calcium events (n= 14 non-overlapping fields of view from 5 mice, Gq+saline: mean = 2.596 $\pm$ 0.4362, Gq+CNO: mean= 1.11 $\pm$ 0.1487, \*\*: p=0.0045, paired t-test). **E.** Quantification of the average event amplitude (DF/F0) (n= 14 non-overlapping fields of view from 5 mice, Gq+saline: mean = 78.87 $\pm$ 2.490, Gq+CNO: mean= 70.26 $\pm$ 2.178, \*: p=0.0357, paired t-test). Box plots as defined in Fig. 2B.

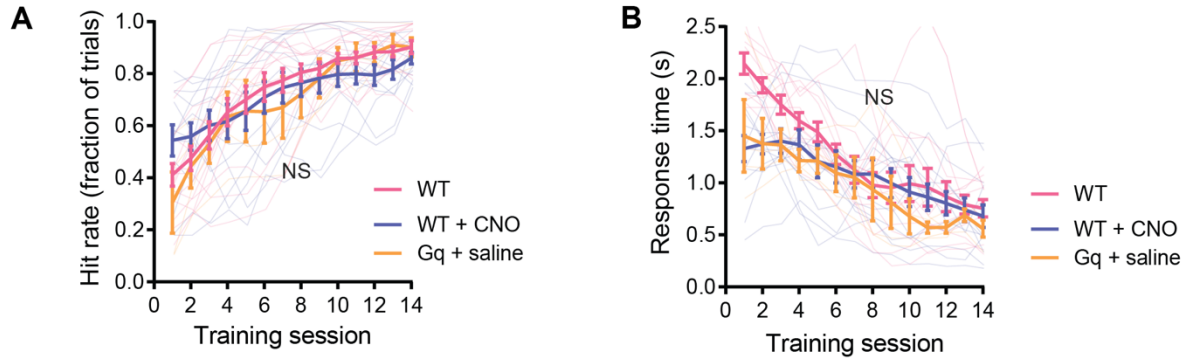

1378

1379

1380 **Supplemental Figure 5: Gq-DREADD expression in M1 astrocytes does not have a CNO-**

1381 **independent effect on hit rate and response time. A.** Hit rate (n= 14 WT, 12 WT + CNO, 4 Gq

1382 +saline mice, NS:  $p=0.8382$  for variation explained by group,  $p<0.0001$  for variation explained by

1383 training time, two-way Repeated Measures ANOVA). **B.** Response time (n= 14 WT, 12 WT +

1384 CNO, 4 Gq +saline mice, NS:  $p=0.0809$  for variation explained by group,  $p<0.0001$  for variation

1385 explained by training time, two-way Repeated Measures ANOVA).

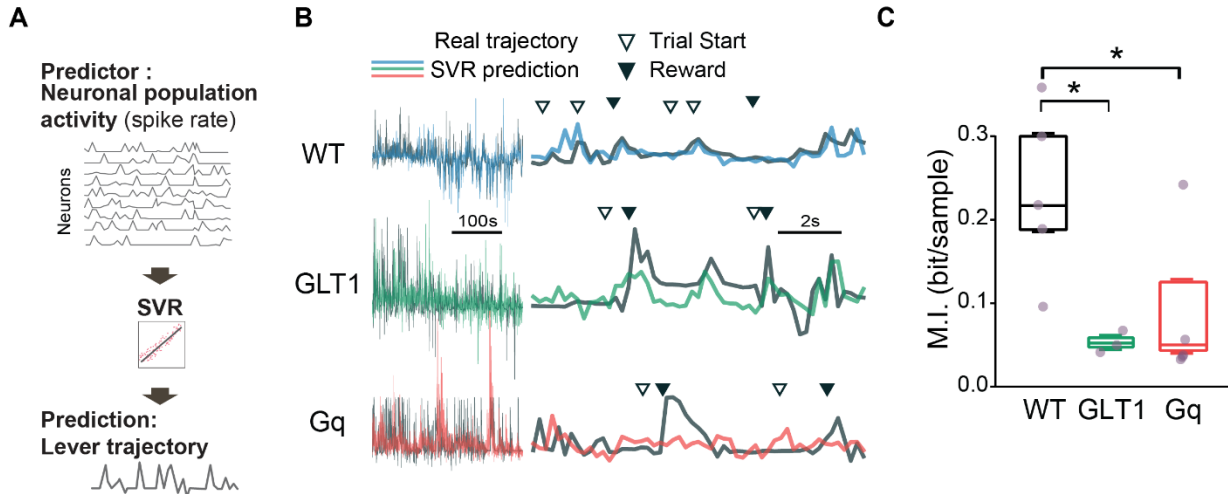

1386  
1387 **Supplemental Figure 6: M1 neuronal population decoding of movement trajectories.** **A.** A  
1388 support vector regression (SVR) decoding model was used to predict the push trajectory during  
1389 each training session from neuronal population spiking rate. **B.** Example lever movement traces  
1390 decoded from the neuronal population activity, compared to actual traces. Black: actual movement  
1391 trajectory; Blue: decoded trace from WT animals; Green: decoded trace from GLT1 animals; Red:  
1392 decoded trace from Gq animals. **Left:** Predicted and actual traces; scale bar represents 100s. **Right:**  
1393 zoomed in traces; scale bar represents 2s. Arrows indicate trial start (white) and reward or time  
1394 when lever position reached reward threshold (black). **C.** Decoding performance (mutual  
1395 information) was decreased in both GLT1 and Gq mice. N = 5/3/5 mice for WT/GLT1/Gq  
1396 respectively; WT: median=0.219, GLT1: median=0.054, \*: p = 0.0357, Mann-Whitney U test;  
1397 WT: median=0.219, Gq: median=0.052, \*: p=0.0318, Mann-Whitney U test. N= 13/11/16 non-  
1398 overlapping fields of view, 33 to 91 neurons per field-of-view, total 580/586/565 neurons and  
1399 734/911/631 trials, from 5/3/5 WT/GLT1/Gq mice respectively. Box plots as defined in Fig. 2B.

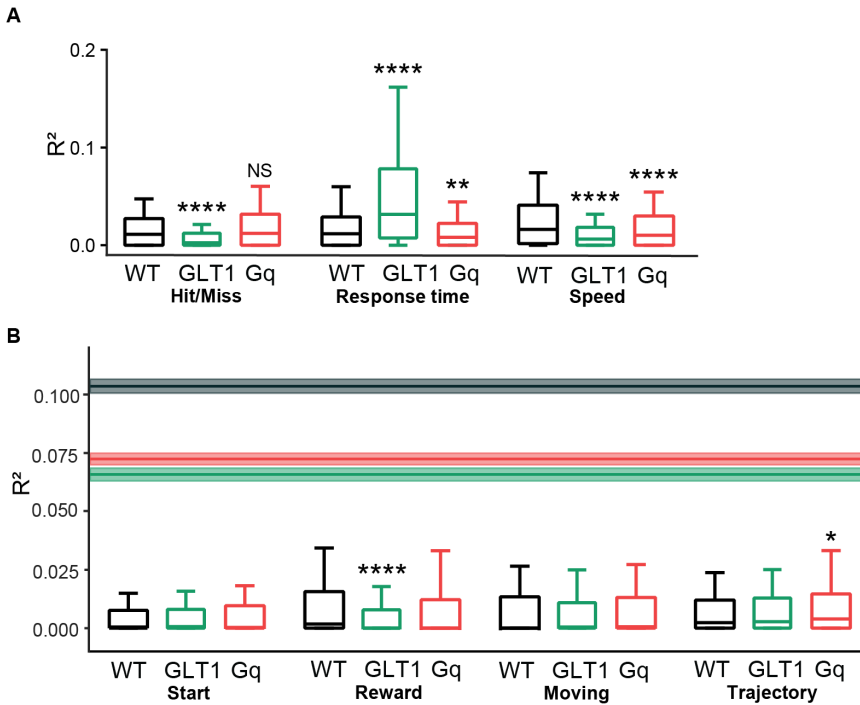

1400  
1401  
1402  
1403  
1404  
1405  
1406  
1407  
1408  
1409  
1410  
1411  
1412  
1413  
1414  
1415  
1416  
1417  
1418  
1419

**Supplemental Figure 7: Encoding Performance of Behavioral Predictors for Neuronal Activity.** **A.** Encoding performance of the GLM, as described in Fig.8, for the behavioral features with  $R^2 > 1\%$ : Hit/Miss, response time and speed. GLT1 mice showed less encoding of the trial outcome Hit/Miss (\*\*\*\*:  $p = 1.17E-17$ , Mann-Whitney U test) whereas Gq mice showed no significant difference from WT (NS:  $p = 0.208$ , Mann-Whitney U test). Response time was encoded less in Gq mice (\*\*\*\*:  $p = 0.00201$ , Mann-Whitney U test) but more in GLT1 mice (\*\*\*\*:  $p = 1.38E-22$ , Mann-Whitney U test), consistent with the behavioral differences observed in these mice. Both astrocyte manipulations reduced push speed encoding in M1 neurons (WT vs Gq, \*\*\*\*:  $p = 7.01E-6$ ; WT vs GLT1, \*\*\*\*:  $p = 2.62E-17$ ; Mann-Whitney U tests), consistent with the disruptive effect of Gq and GLT1 manipulations on push trajectory decoding. **B.** Encoding performance of other behavioral features, with  $R^2 < 1\%$ : start, reward, lever move and lever trajectory. Horizontal lines show the median predictive power of the full model in 3 experimental groups, and the shaded areas show their respective notch size. Neurons in GLT1 animals showed less encoding of the movement onset/reward (WT vs GLT1, \*\*\*\*:  $p = 4.30E-7$ , Mann-Whitney U test). Gq neurons showed a moderately higher encoding of push trajectory than WT (WT vs Gq, \*:  $p = 0.0482$ , Mann-Whitney U test).  $N = 13/11/16$  non-overlapping fields of view, 33 to 91 neurons per field-of-view, total 580/586/565 neurons and 734/911/631 trials, from 5/3/5 WT/GLT1/Gq mice respectively. Box plots as defined in Fig. 2B.

1420 **Supplemental Tables 1-3:**

1421

1422 **Supplemental Table 1: List of Differential Expression Genes (DEGs) in M1 Astrocytes**  
1423 **During Motor Learning** Table of DEGs identified using EdgeR, for both novice/naïve and  
1424 expert/naïve comparison with logarithm of fold change (logFC) and p-value (PValue). The last  
1425 two columns specify if the gene is a DEG (p-value<0.05) for the novice/naïve comparison  
1426 (“novice”) or expert/naïve comparison (“expert”).

1427

1428 **Supplemental Table 2: List of DEGs Enriched GO categories** Table of significantly enriched  
1429 GO biological process, molecular function and cellular component categories, from the DEG list.  
1430 P-values are specified for the novice/naïve (“novice”) and expert/naïve (“expert”) comparisons.

1431

1432 **Supplemental Table 3: Gene Set Enrichment Analysis in M1 Astrocytes During Motor**  
1433 **Learning.** Significantly enriched GO biological process gene sets from the whole dataset. Number  
1434 of expressed genes (N Genes) per gene set, false discovery rate (FDR) and gene symbols are  
1435 specified.

1436

1437 **Supplemental Videos 1-2:**

1438

1439 **Supplemental Video 1: Example Calcium Imaging of M1 layer 2/3 Astrocytes During Expert**  
1440 **Training Session. Top:** Overlay of lever position trace (white in black box), trial events (white  
1441 square indicates trial start; green square indicates time when the lever passes the threshold and  
1442 reward is delivered), and GCaMP6f-lck fluorescence acquired by two-photon microscopy in an  
1443 awake, behaving, expert mouse. **Bottom:** Corresponding overlay colored spatiotemporal event  
1444 area as detected by the AQUA analysis. 80.3 x 40.2 µm field of view. Scale bar represents 10µm.  
1445 Video speed 1x, 11fps.

1446

1447 **Supplemental Video 2: Example Calcium Imaging of M1 Layer 2/3 Neurons During Expert**  
1448 **Training Session.** Overlay of lever position trace (white in black box), trial events (white square  
1449 indicates trial start; green square indicates time when the lever passes the threshold and reward is  
1450 delivered), and GCaMP6s fluorescence acquired by two-photon microscopy in an awake,  
1451 behaving, expert mouse. 274 x 274 µm field of view. Video speed 1x, 5fps.

1452
